# Supplementary material for: Aza-Henry Reactions on C-Alkyl Substituted Aldimines
Source: PubMed Central journal article supplement (PMC6273577; doi:10.3390/molecules21060723), 2016-06-02
Supplement: molecules-21-00723-s001.pdf [file molecules-21-00723-s001.pdf]

# Supplementary Materials: Aza-Henry Reactions on C-Alkyl Substituted Aldimines

Alessia Pelagalli, Lucio Pellacani, Elia Scandozza and Stefania Fioravanti

$^1\text{H}$ - and  $^{13}\text{C}$ -NMR spectra of all new compounds

## *N*-Benzyl-1-nitropropan-2-amine (5a)

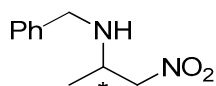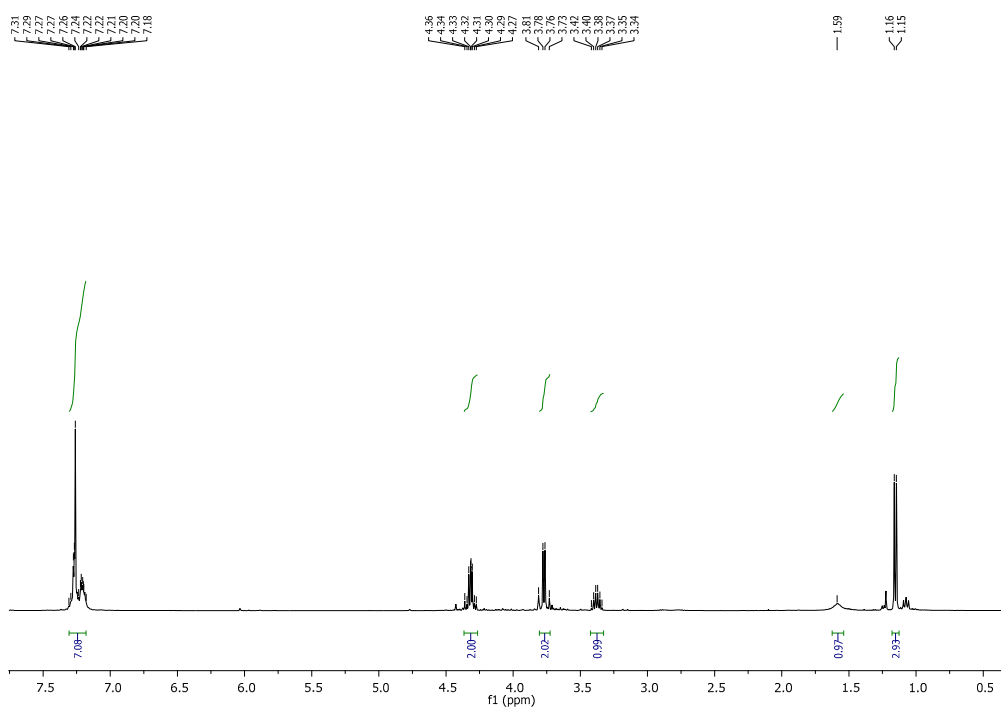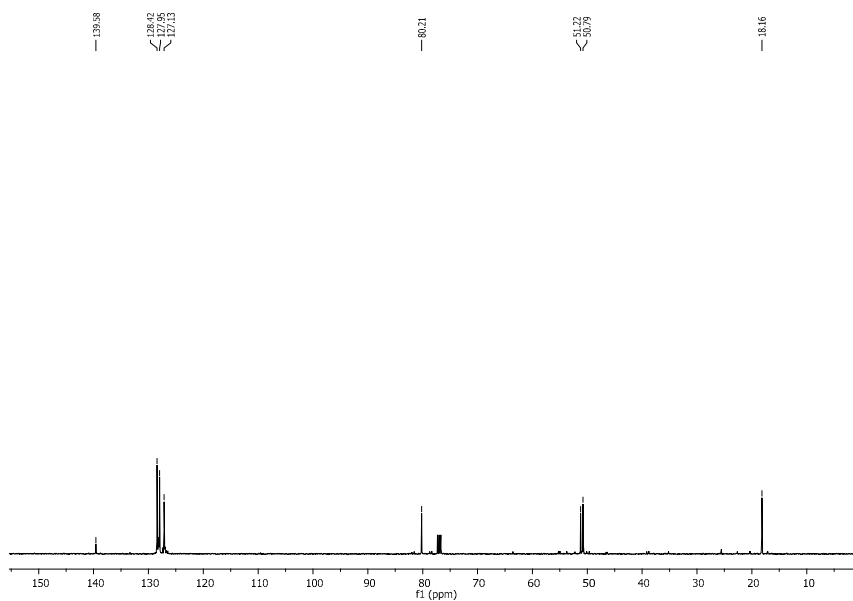

**N-Benzyl-1-cyclohexyl-2-nitroethanamine (5b)**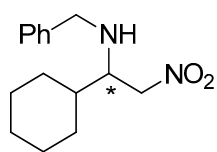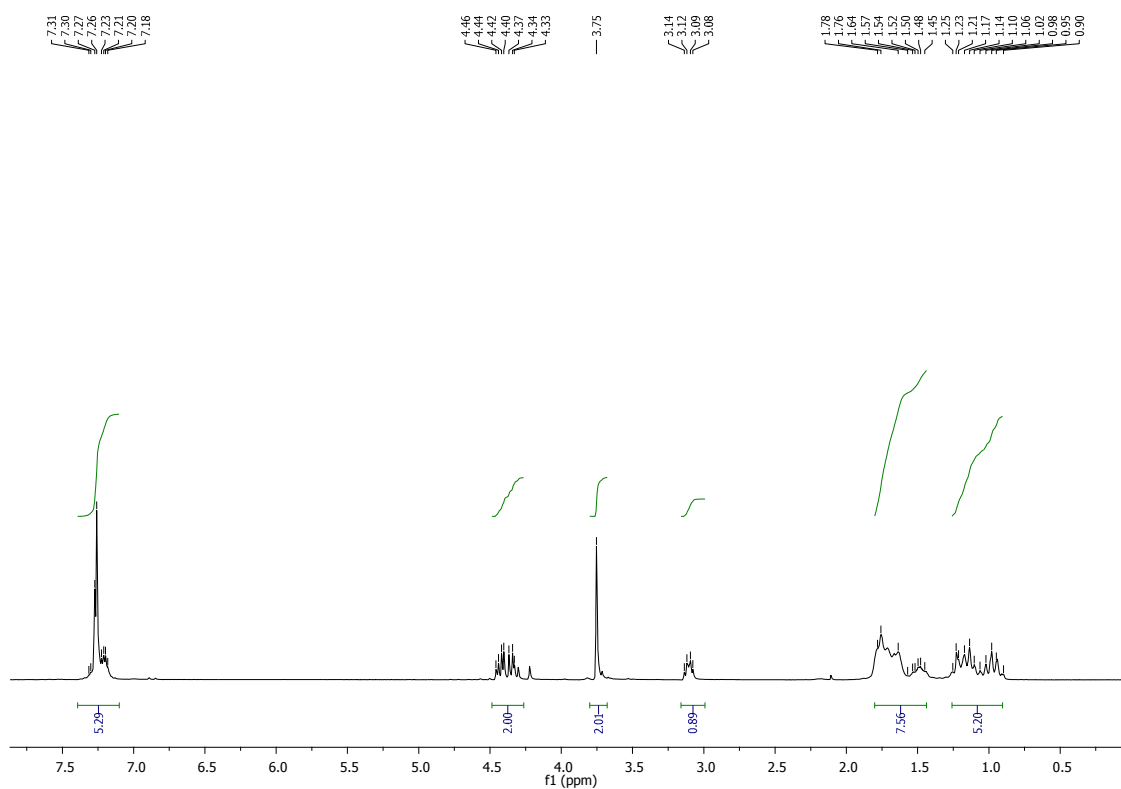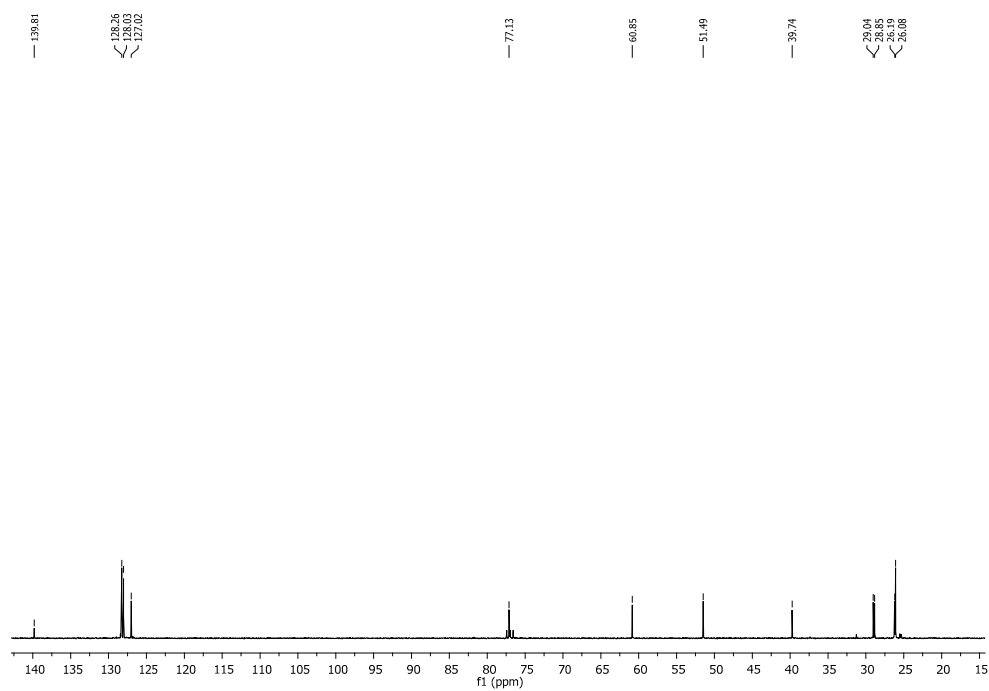

**N-Benzyl-3,3-dimethyl-1-nitrobutan-2-amine (5c)**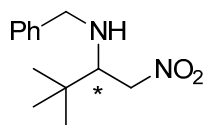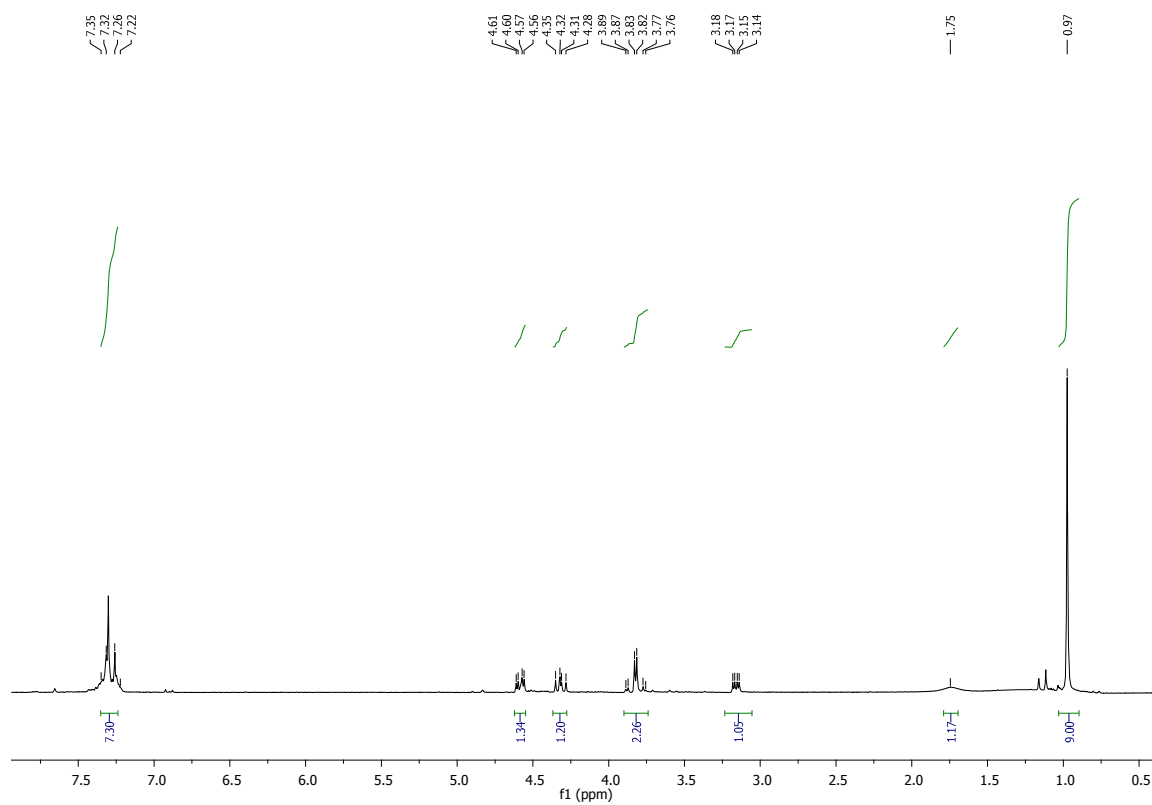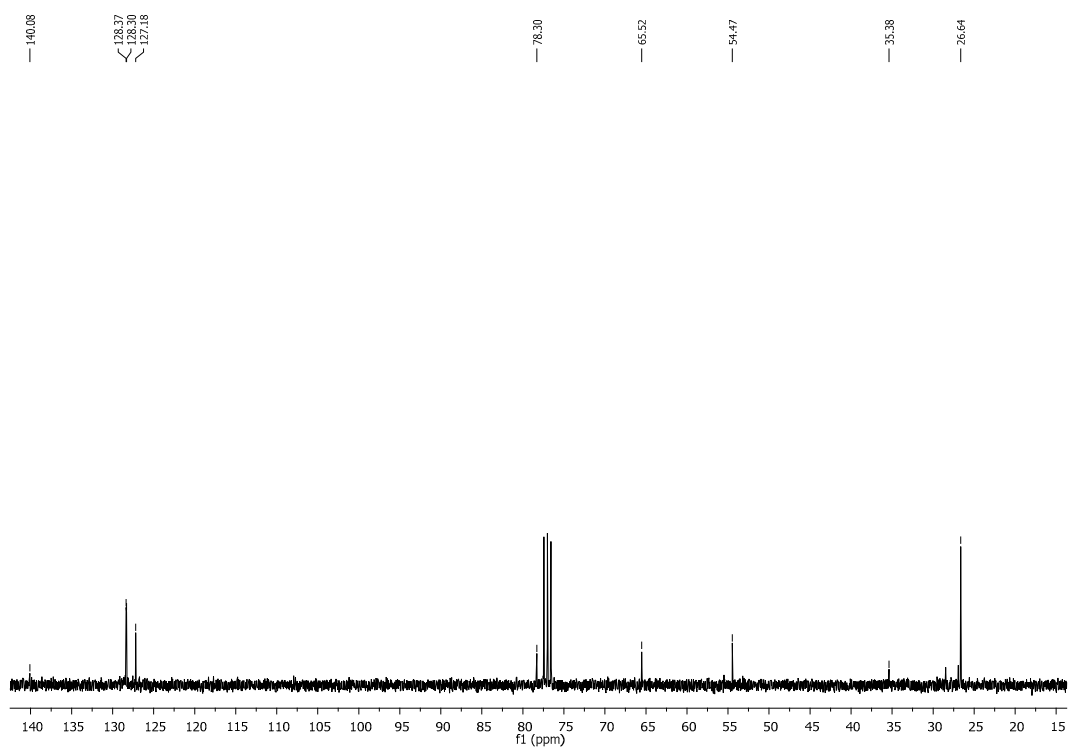

***N*-(1-Nitropropan-2-yl)aniline (5d)**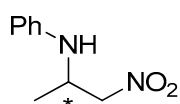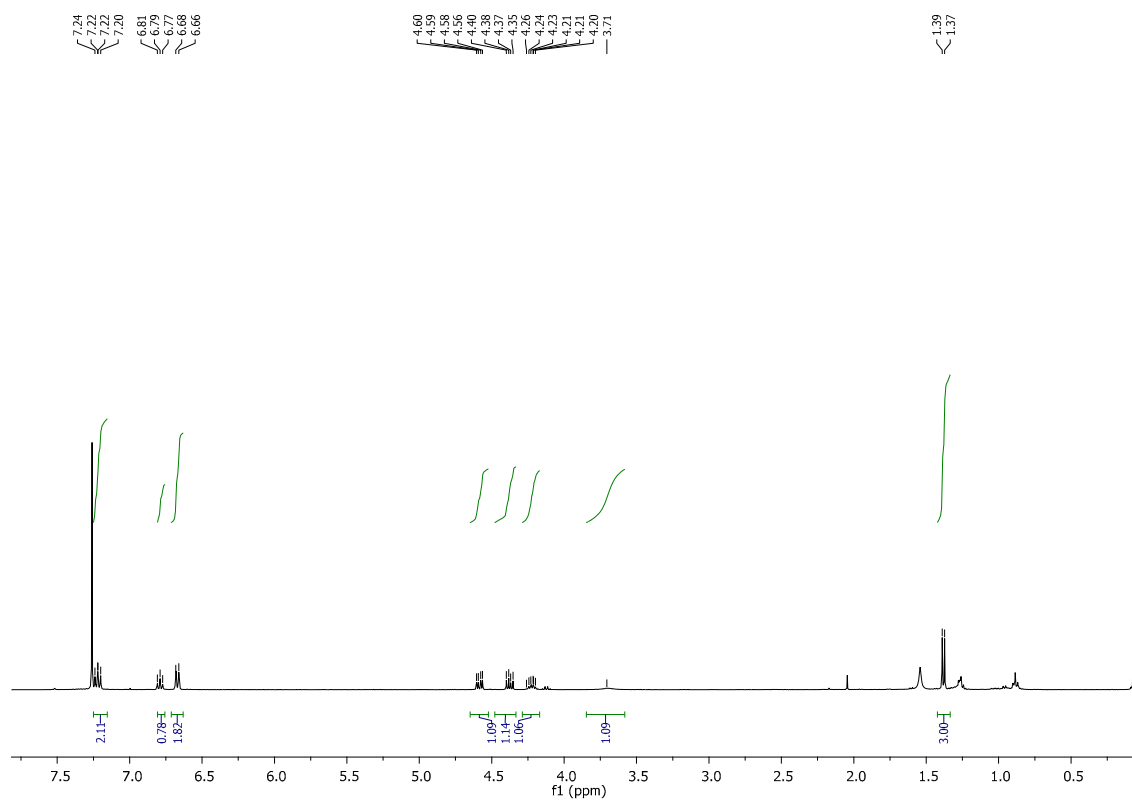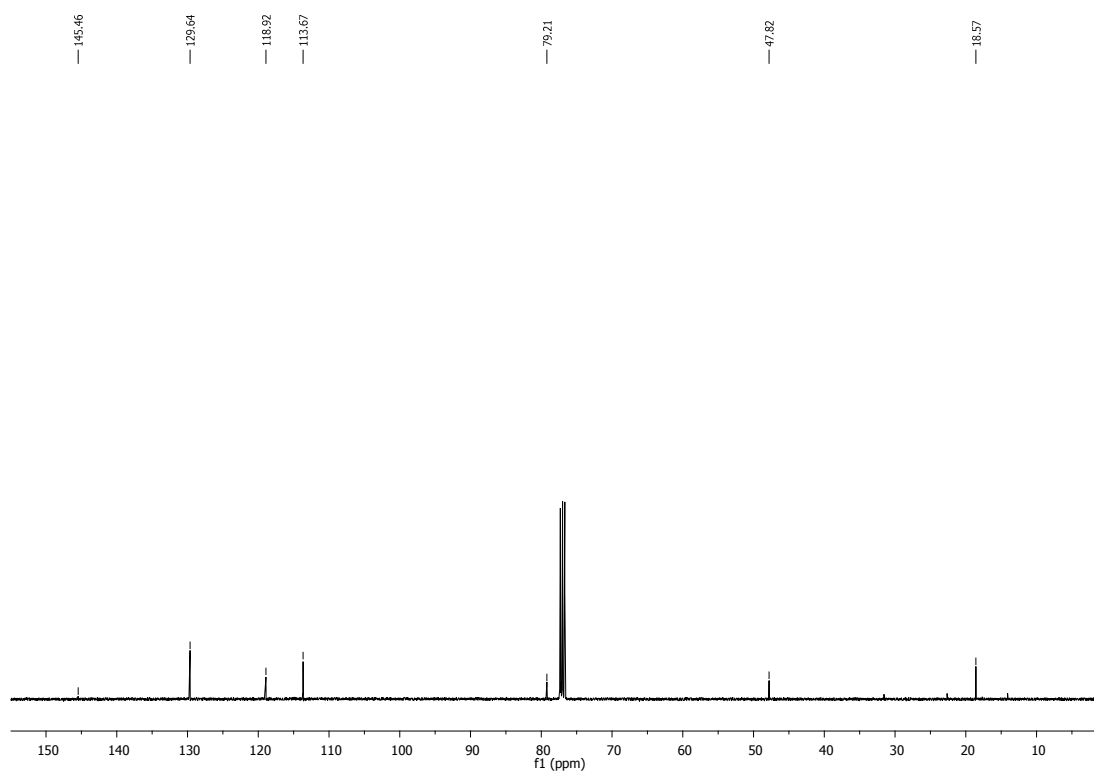

**N-(1-Cyclohexyl-2-nitroethyl)aniline (5e)**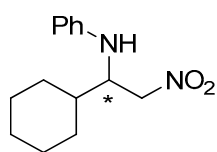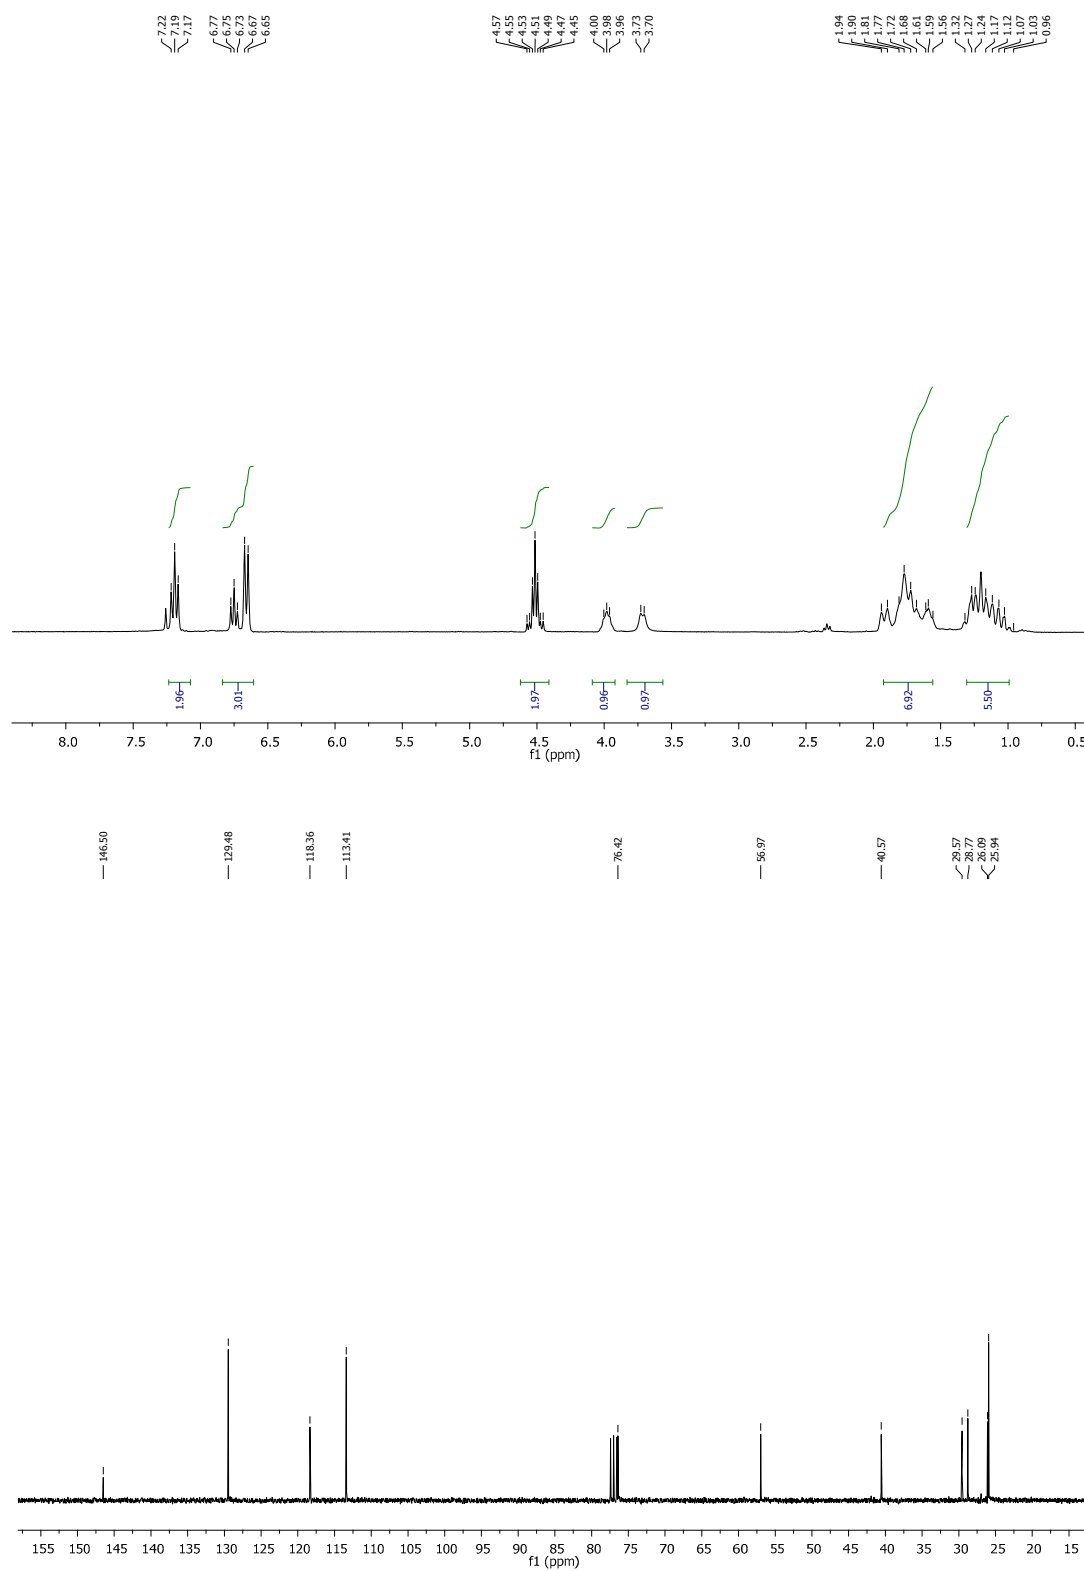

**N-(3,3-Dimethyl-1-nitrobutan-2-yl)aniline (5f)**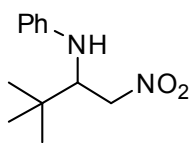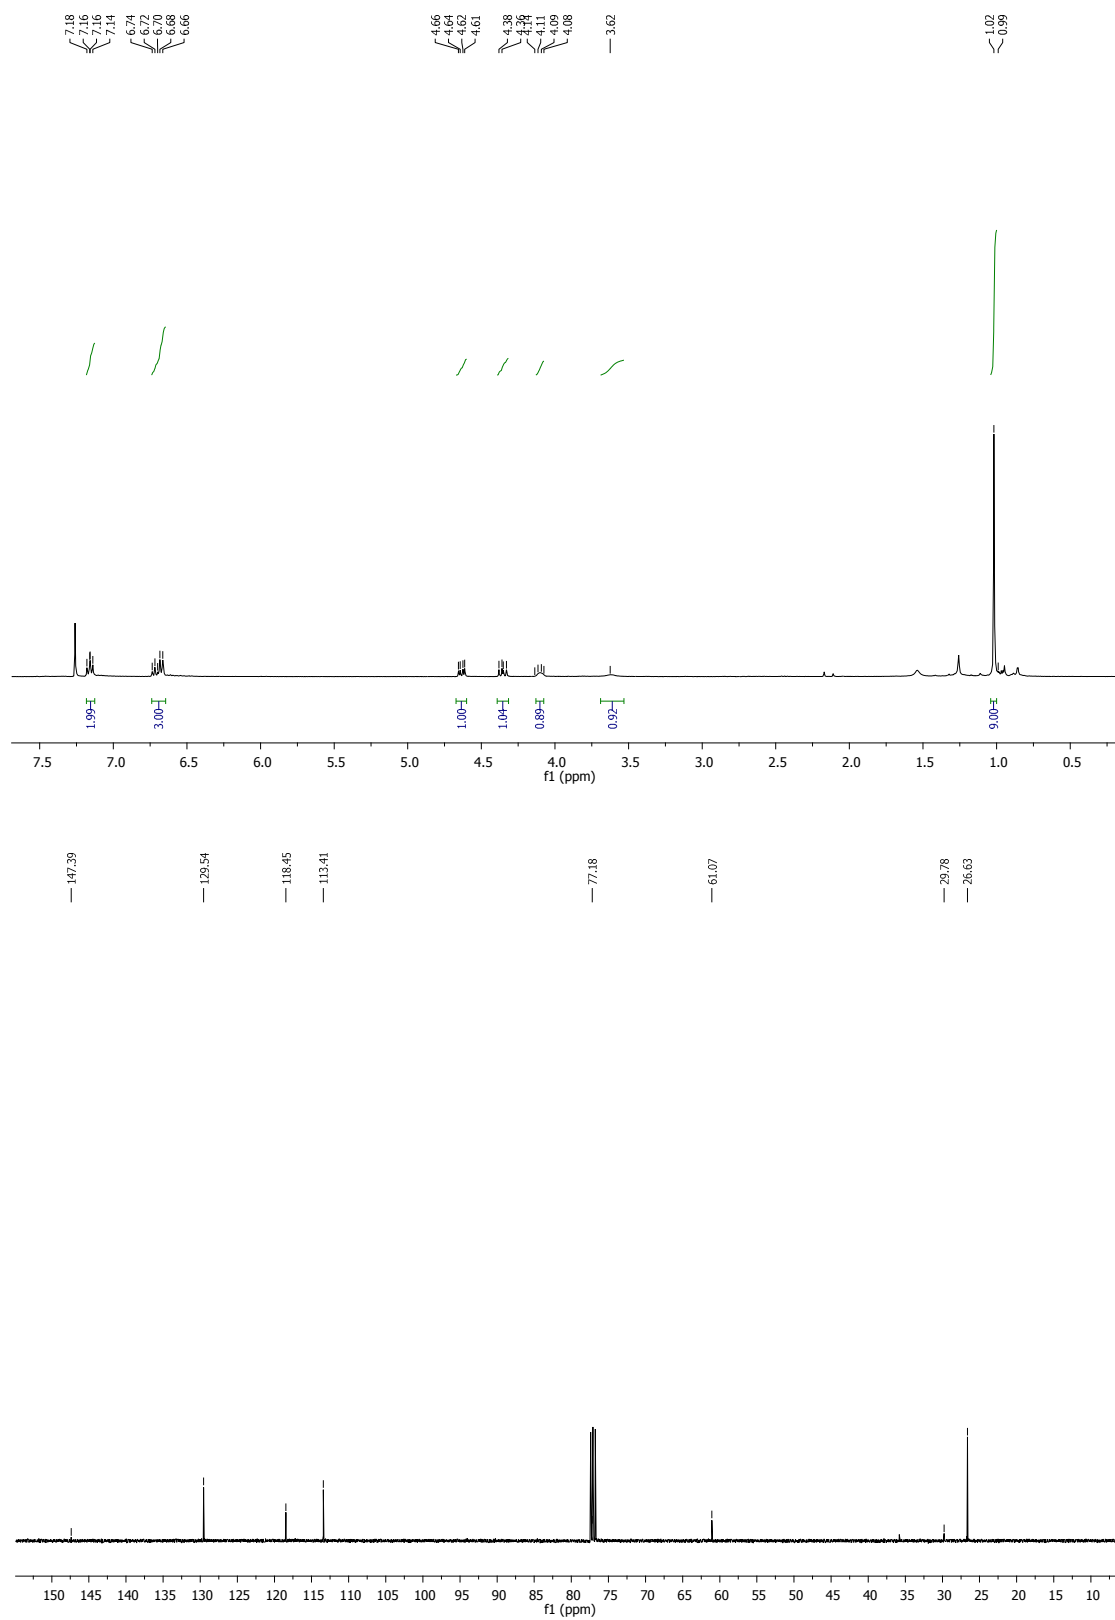

**(S)-1-Nitro-N-[(R)-1-phenylethyl]propan-2-amine (7g)**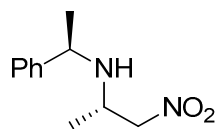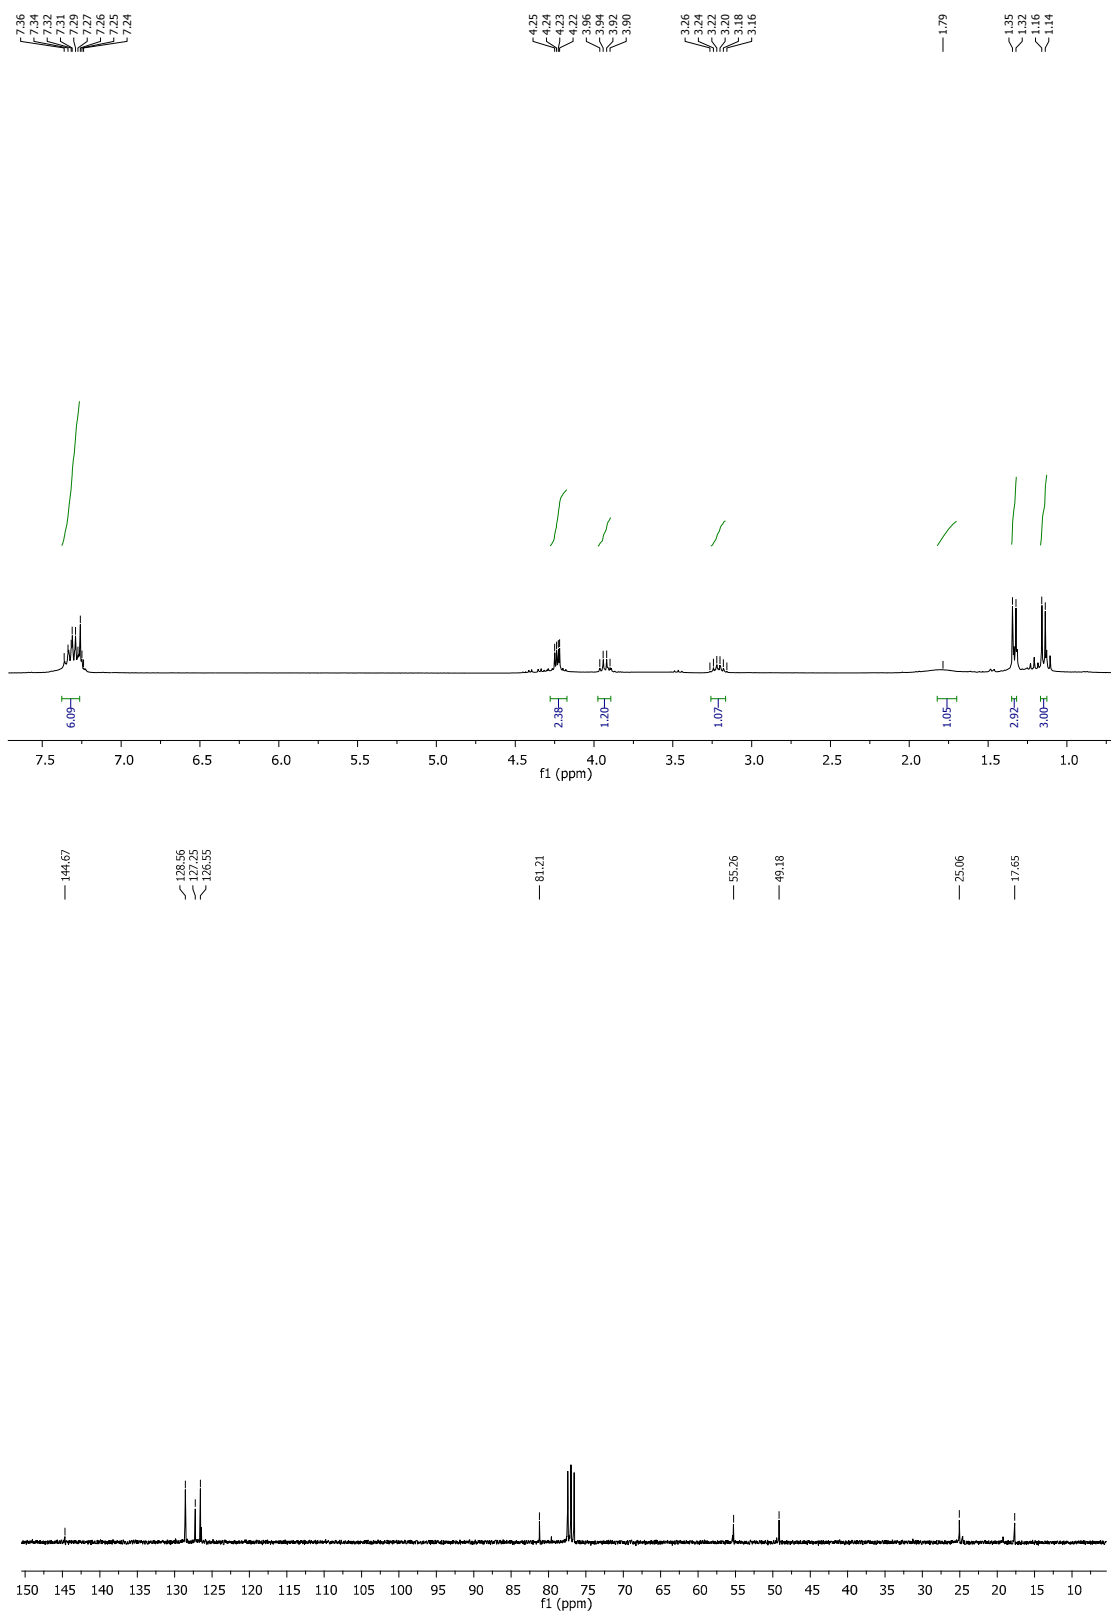

**(R)-1-Nitro-N-[(R)-1-phenylethyl]propan-2-amine (7'g)**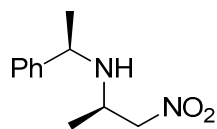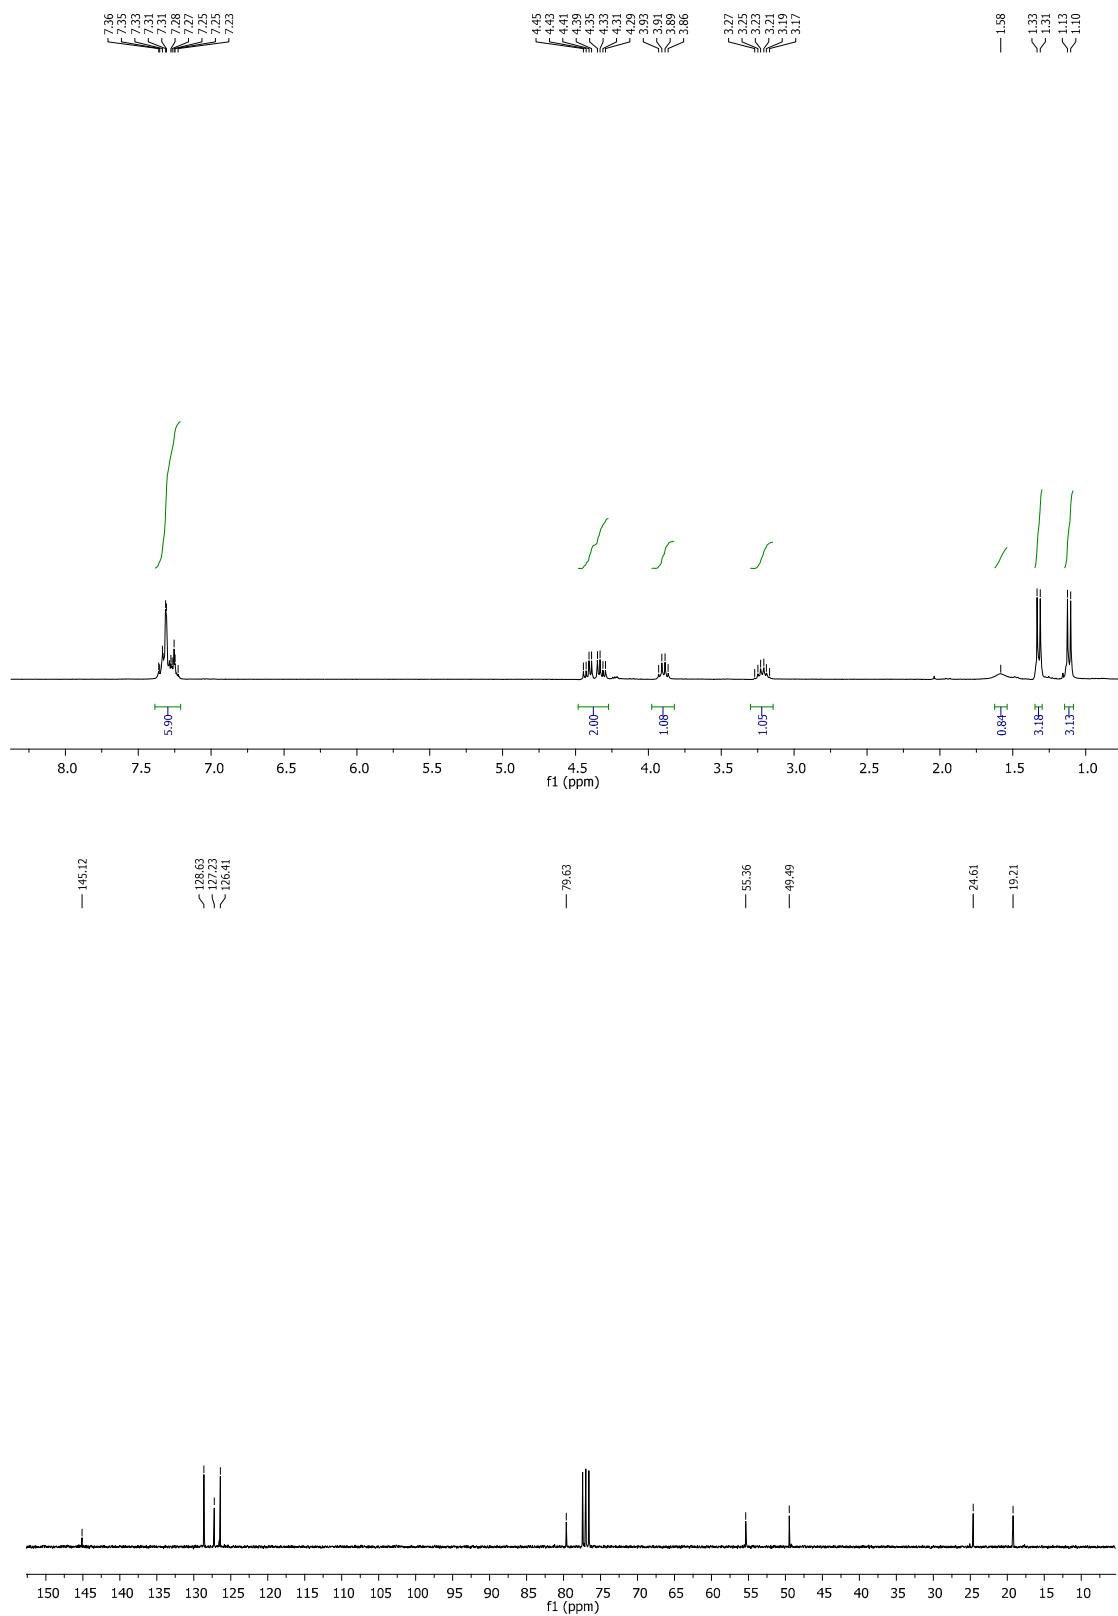



**(S)-1-Cyclohexyl-2-nitro-N-[(R)-1-phenylethyl]ethanamine (7h)**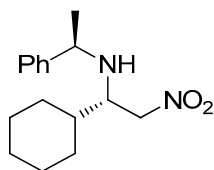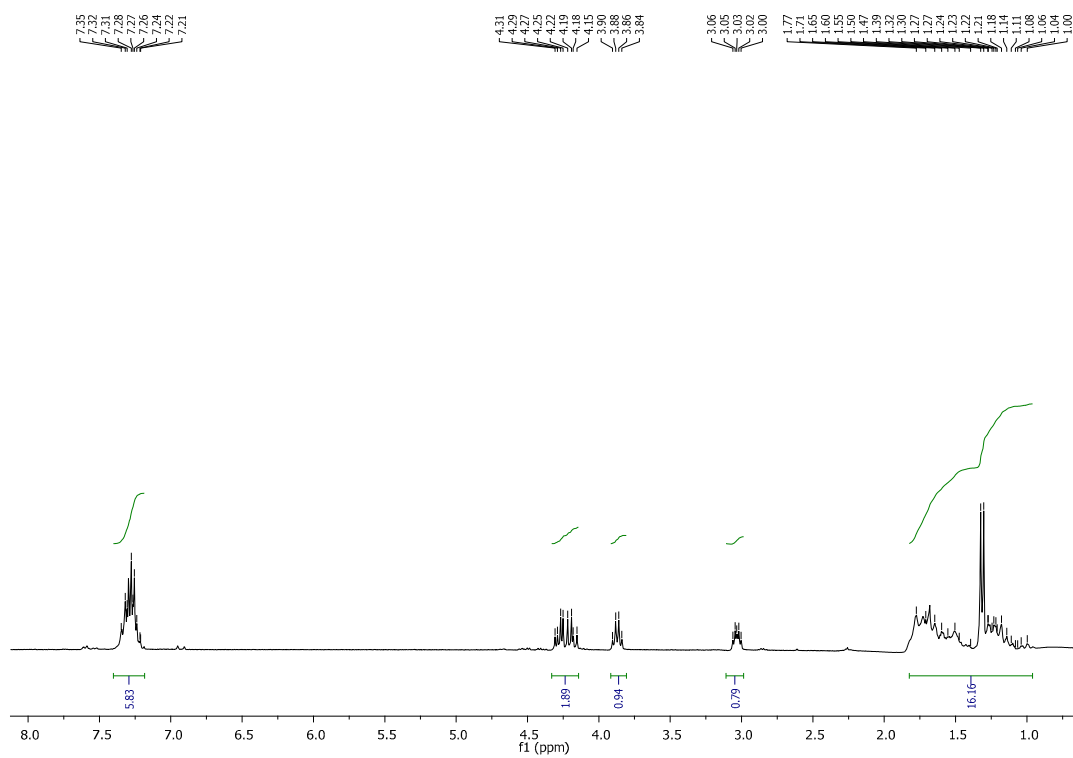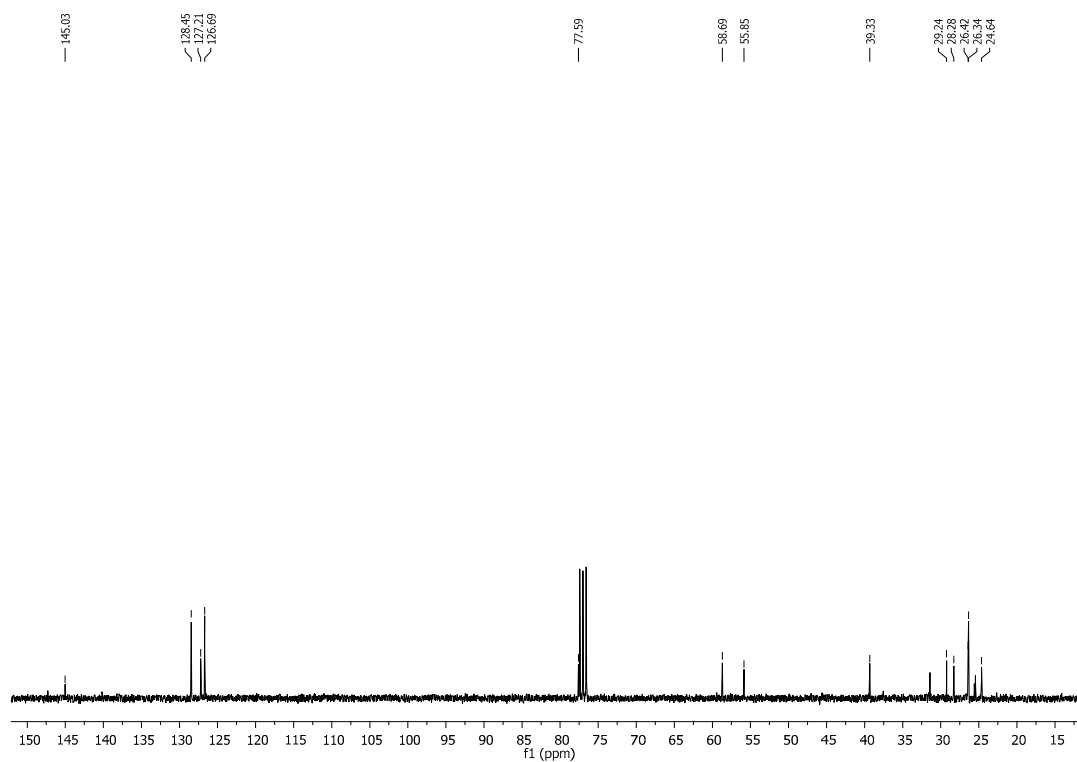

**(R)-1-Cyclohexyl-2-nitro-N-[(R)-1-phenylethyl]ethanamine (7'h)**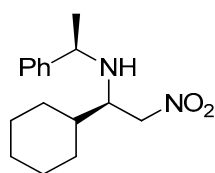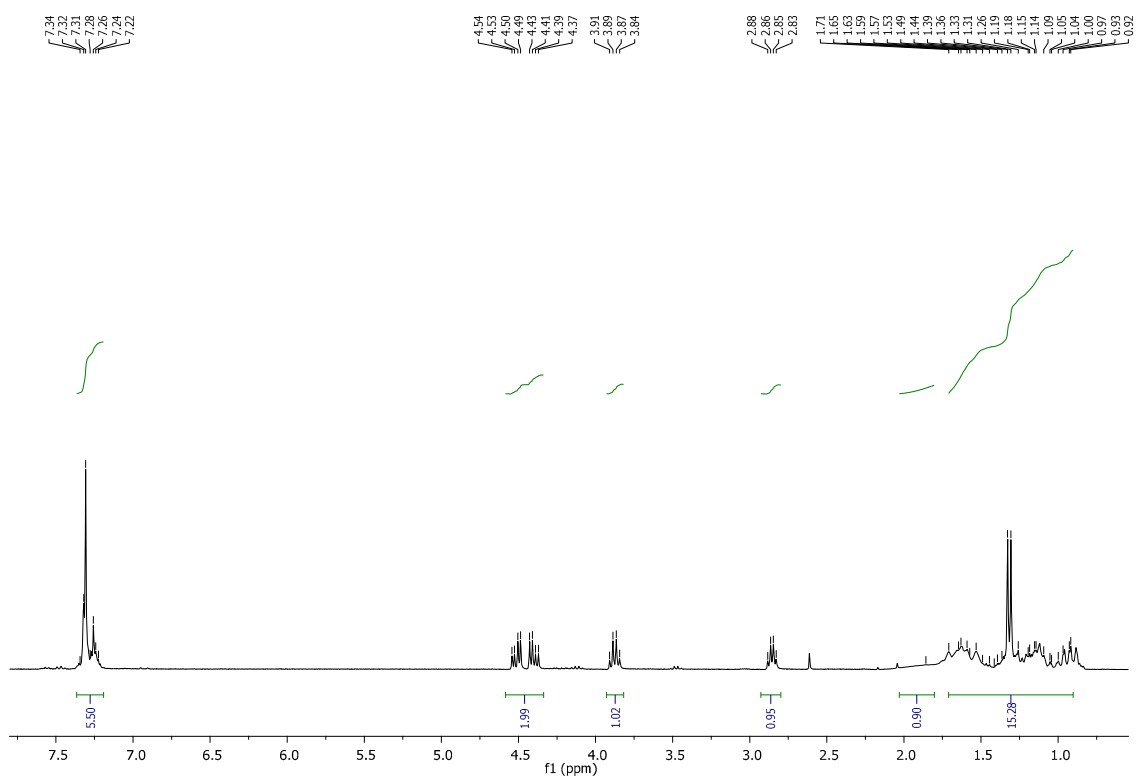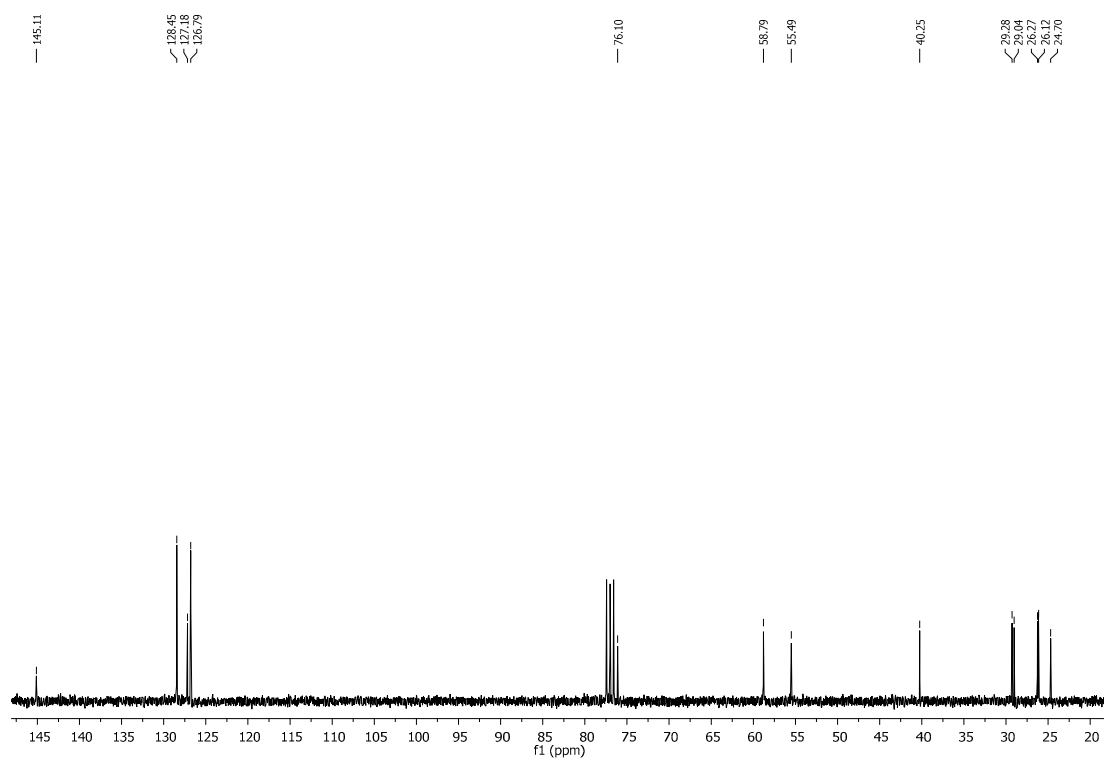

**(S)-3,3-dimethyl-1-nitro-N-[(R)-1-phenylethyl]butan-2-amine (7i)**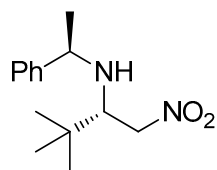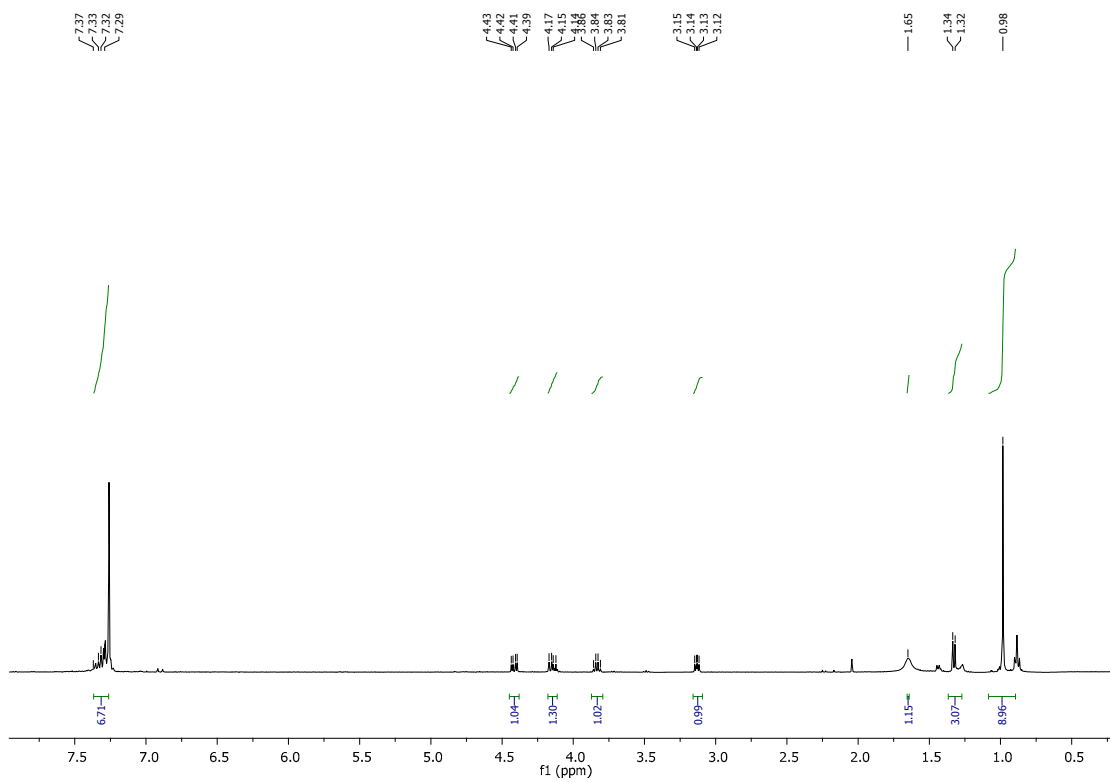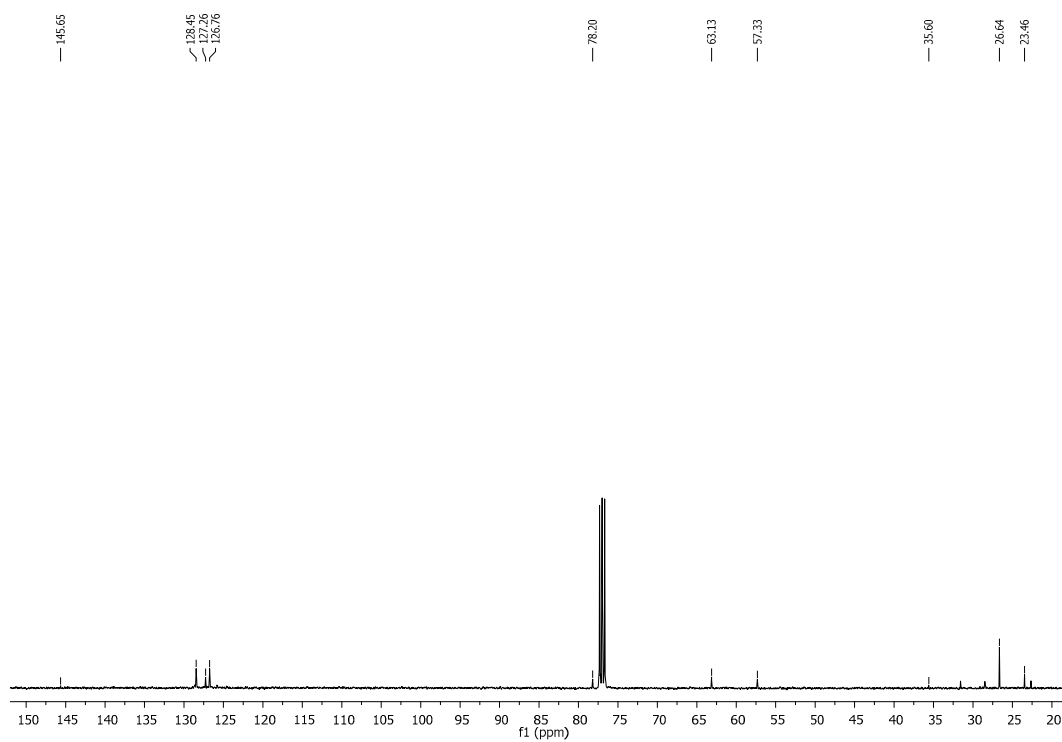

**(R)-3,3-dimethyl-1-nitro-N-[(R)-1-phenylethyl]butan-2-amine (7'i)**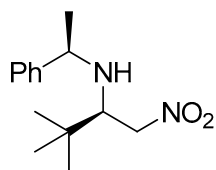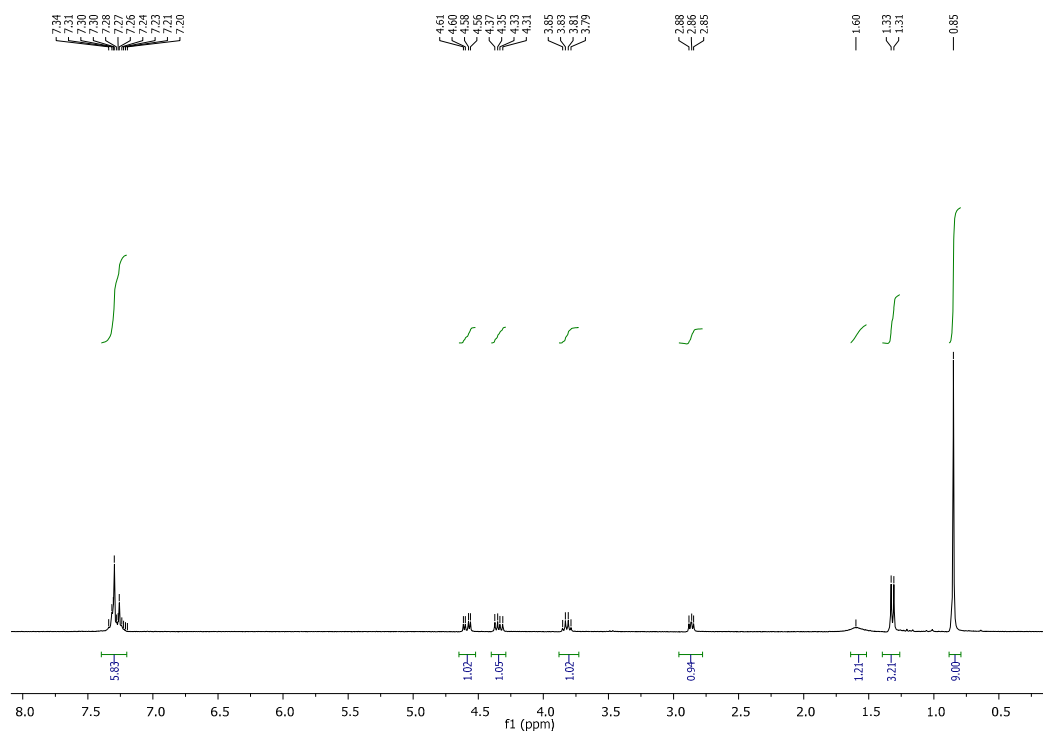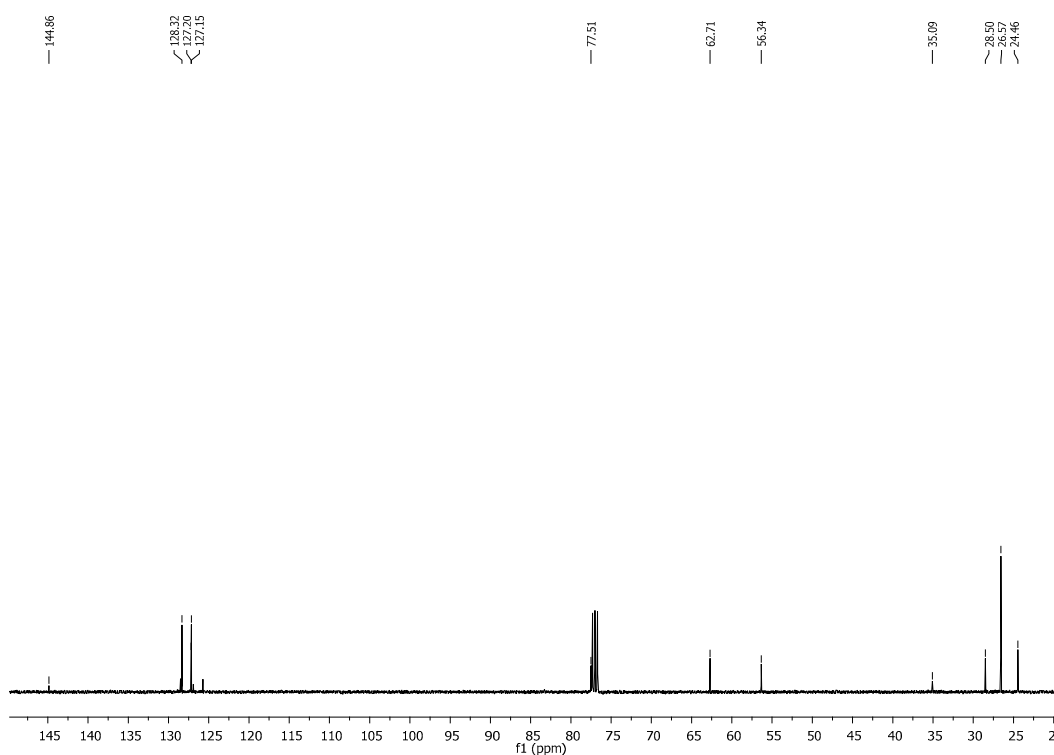

3-Nitro-N-[(R)-1-phenylethyl]butan-2-amine (*syn*-8/8'*g*; *anti*-9/9'*g*)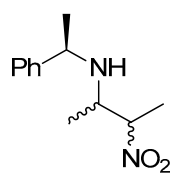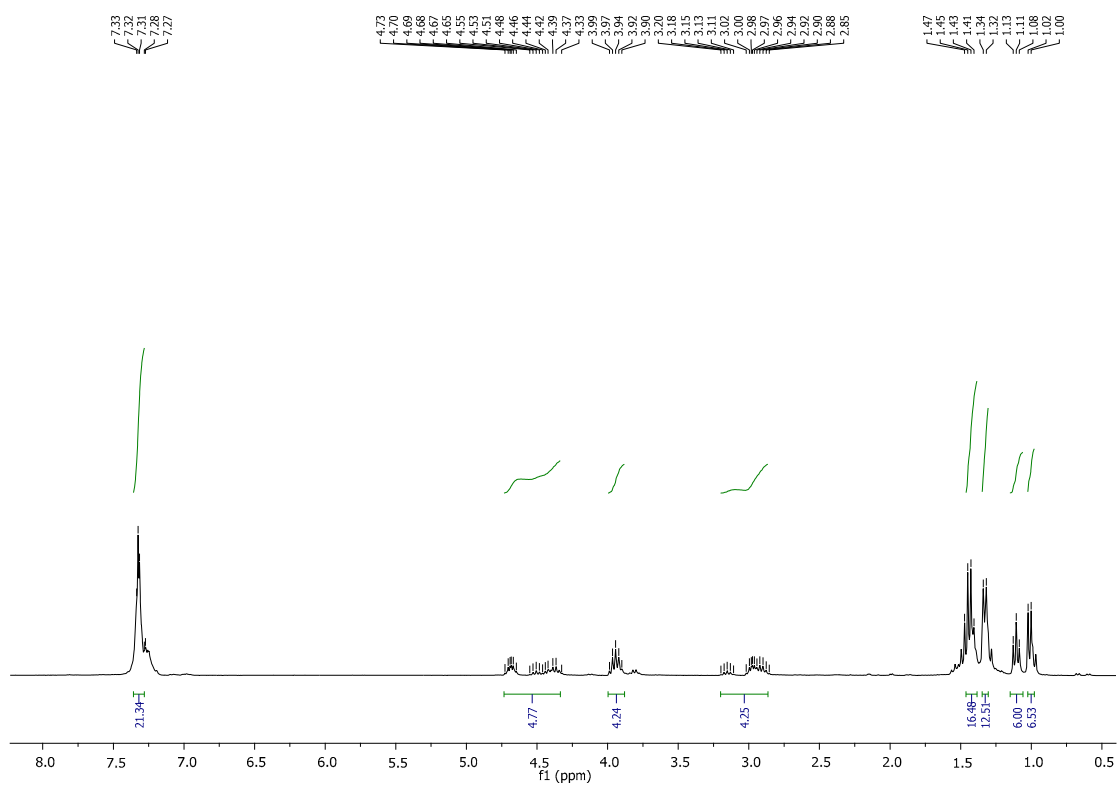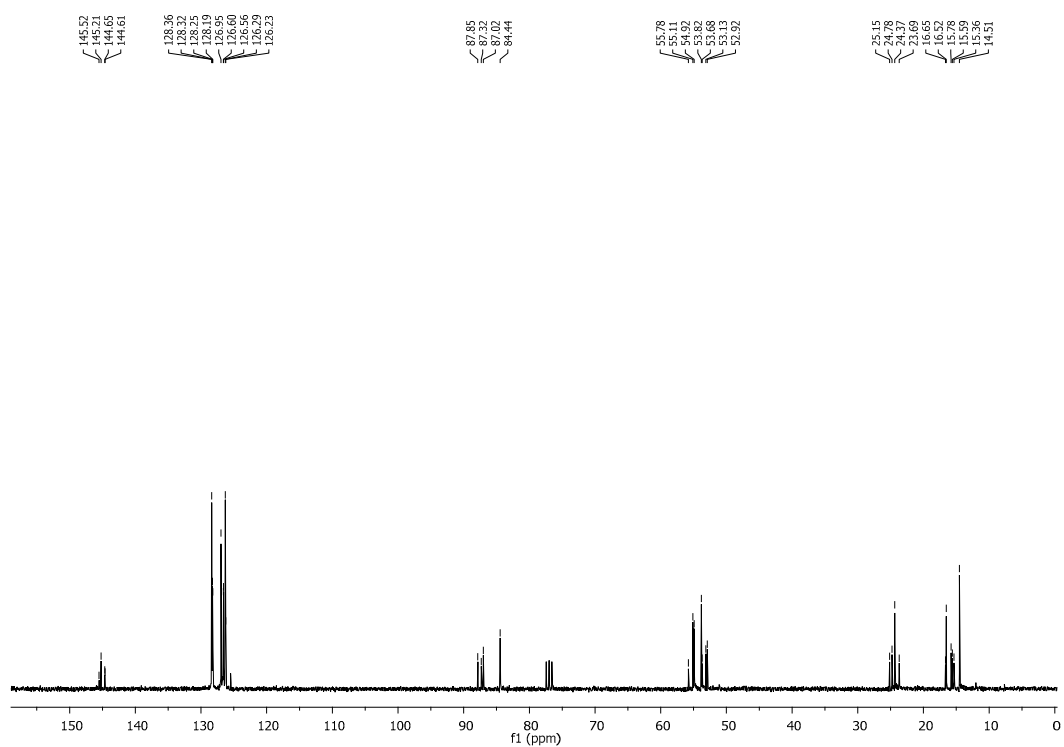

**(2R,3S)-3-Nitro-N-[(R)-1-phenylethyl]butan-2-amine (anti-9'g)**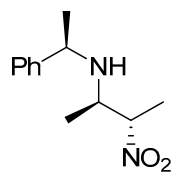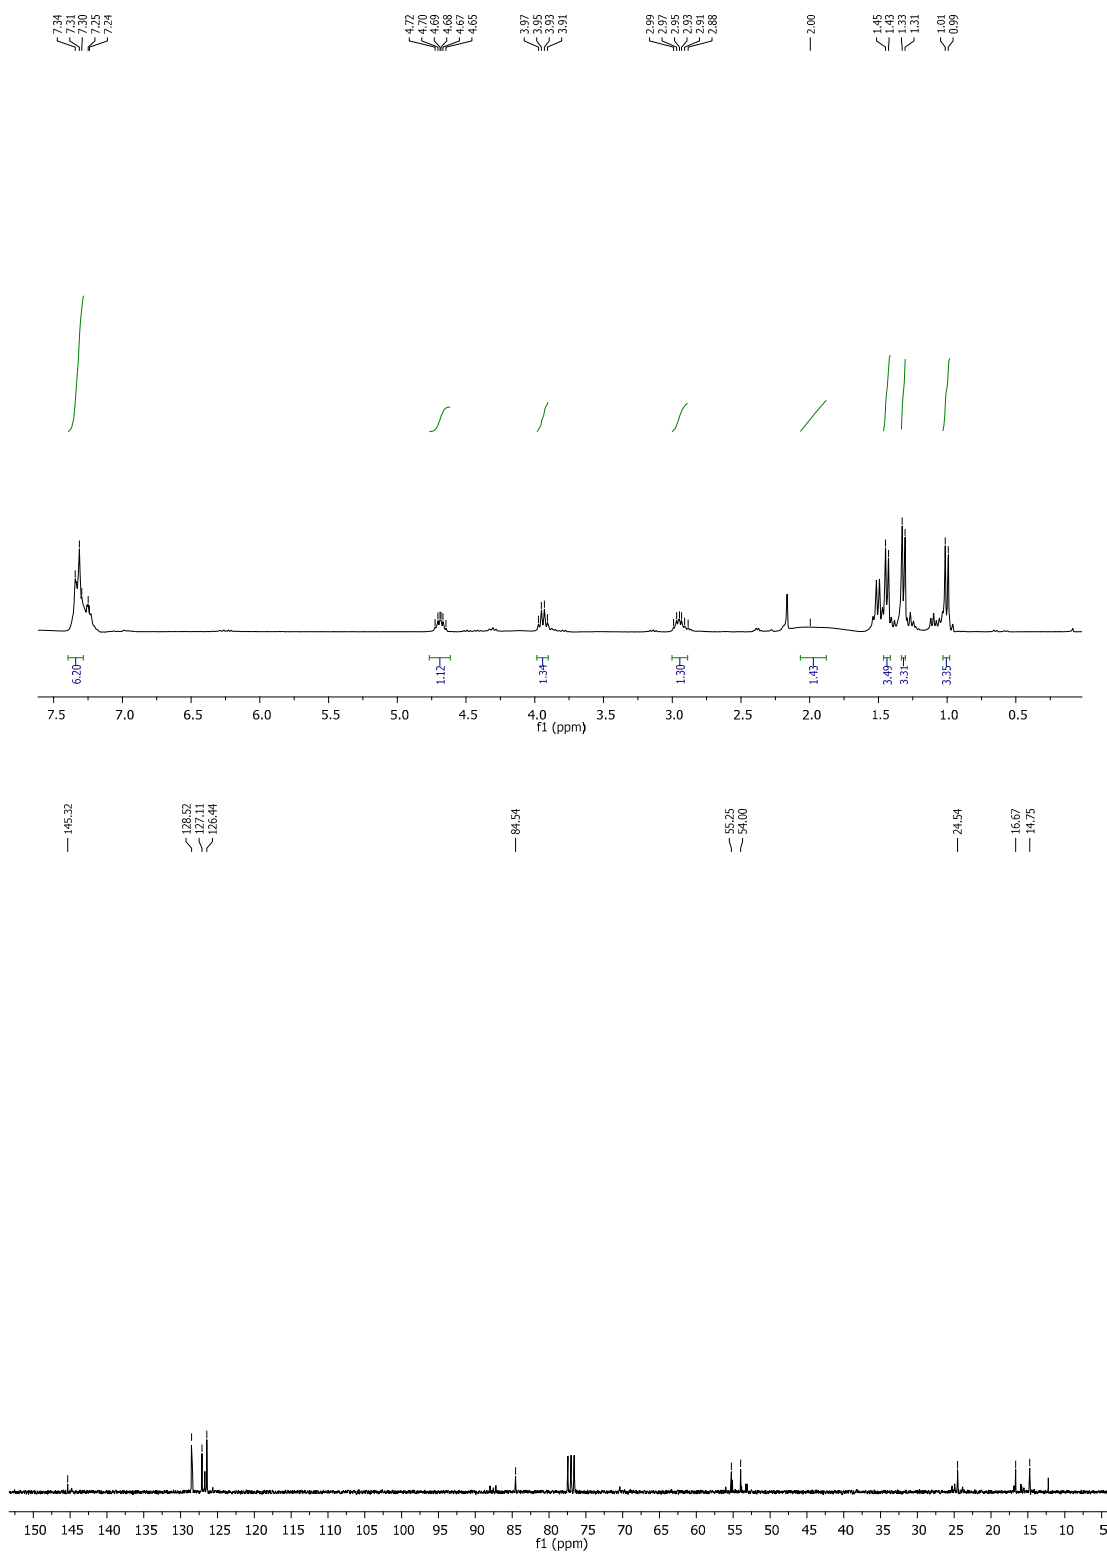

**(R)-1-Cyclohexyl-2-nitro-N-(1-phenylethyl)propan-1-amine (syn-8'h/anti-9'h)**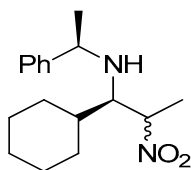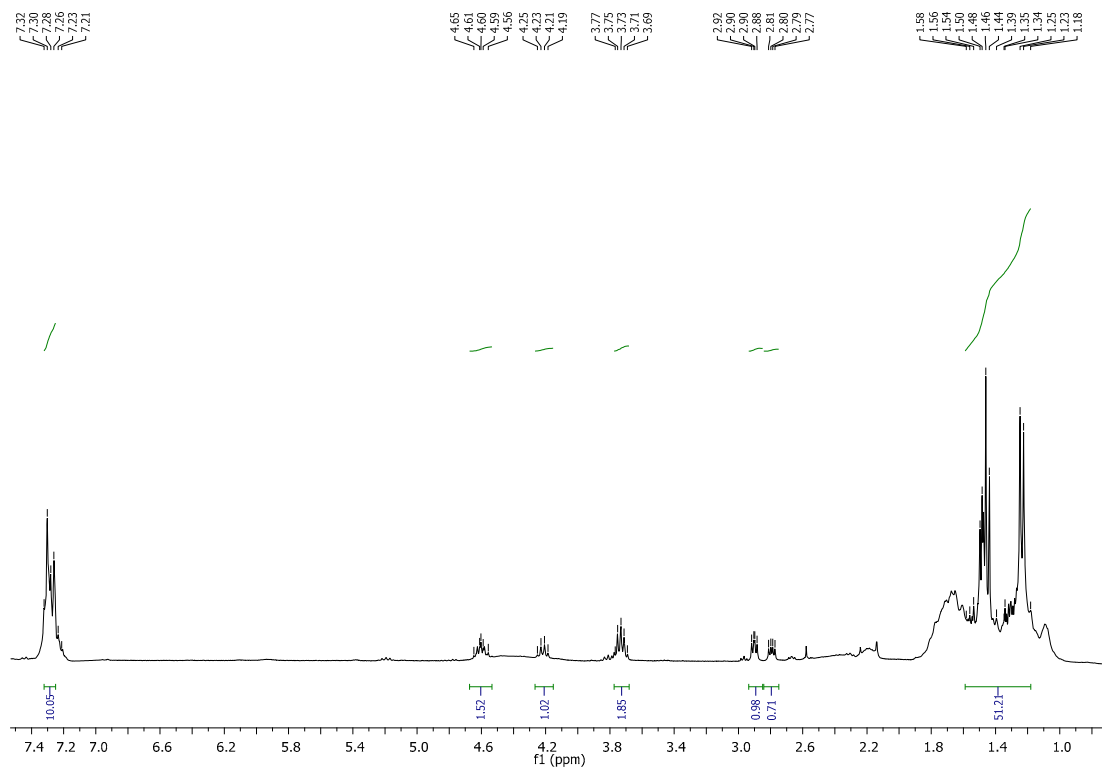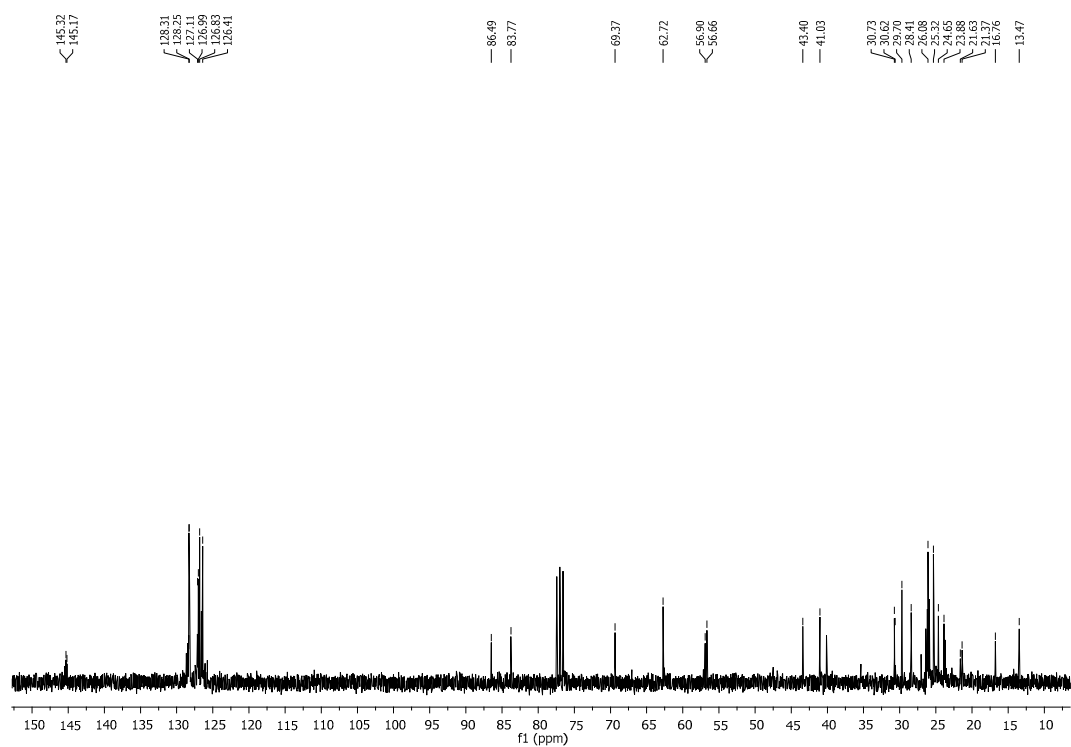

## Computational Details

All optimized geometries were located using hybrid functional theory (B3LYP) [1] and the 6-31G(d, p) [2–4] basis set using the continuum solvation model [6] with chloroform ( $\epsilon = 4.71$ ) as the solvent conforming to the experimental conditions. All calculations were carried out using the Gaussian 09 program [6].

## 2D NMR spectra and optimized geometries to determine the absolute configuration of the new chiral centers.

To determine the absolute configuration of the new trifluoromethyl substituted chiral center ( $C_\beta$ ), 2D NMR spectra and optimized geometries of new optically pure  $\beta$ -nitro amines compounds were obtained.

### 2D NMR spectra and optimized geometries

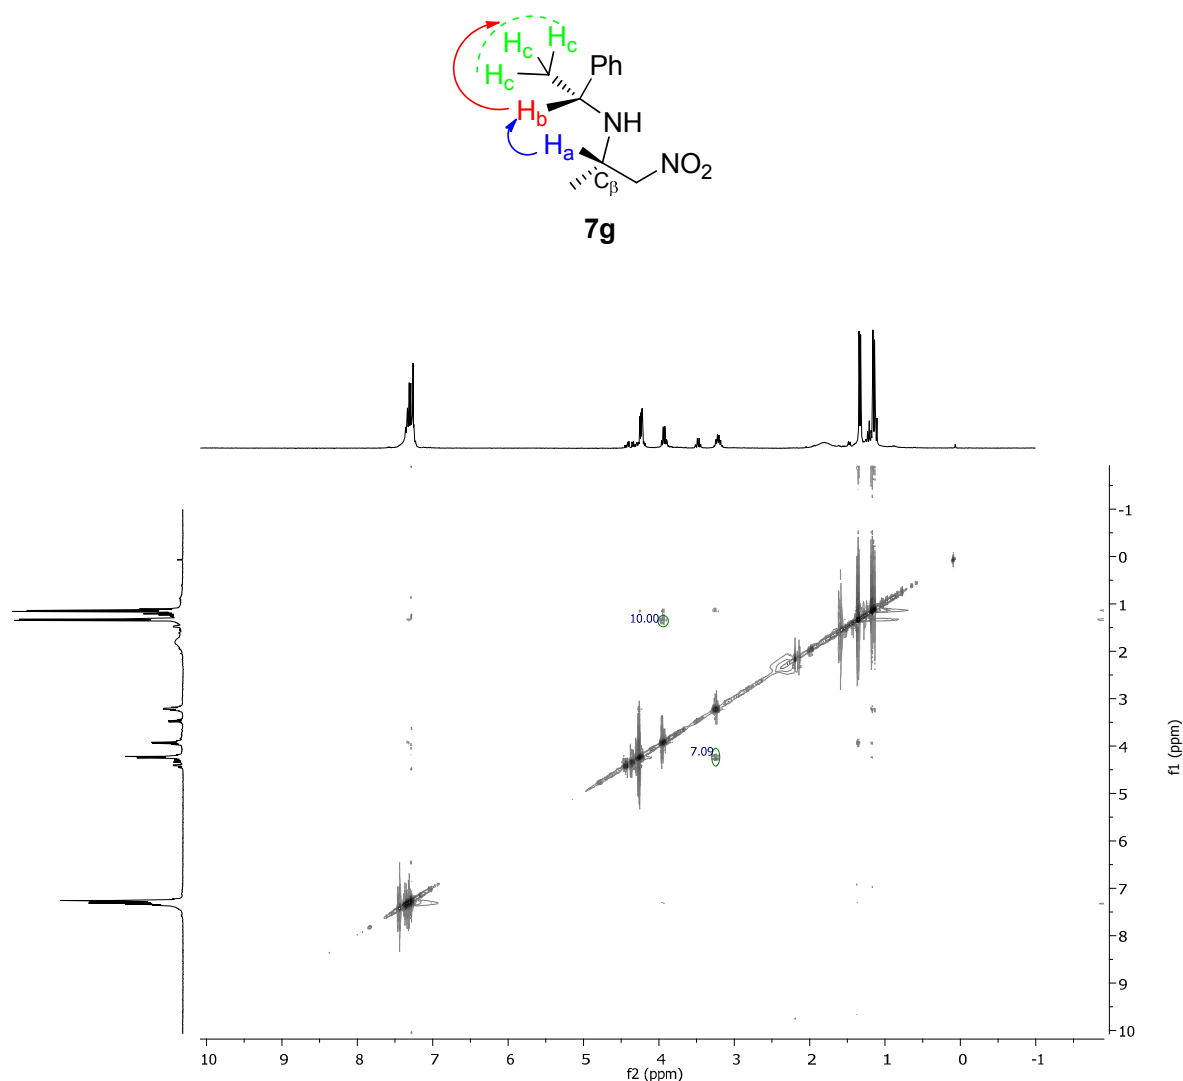

NOESY spectrum of **7g**. The cross peak between the protons H<sub>b</sub> and H<sub>c</sub> was used as a distance ruler and its volume was set to 10.00 a.u.; the cross peak between H<sub>b</sub> and H<sub>a</sub> was measured 7.09 a. u. (corresponding to an interproton distance of 2.84 Å), in order to determine the absolute configuration.



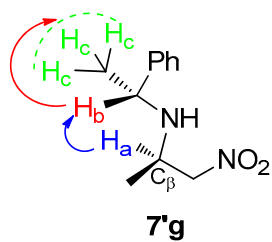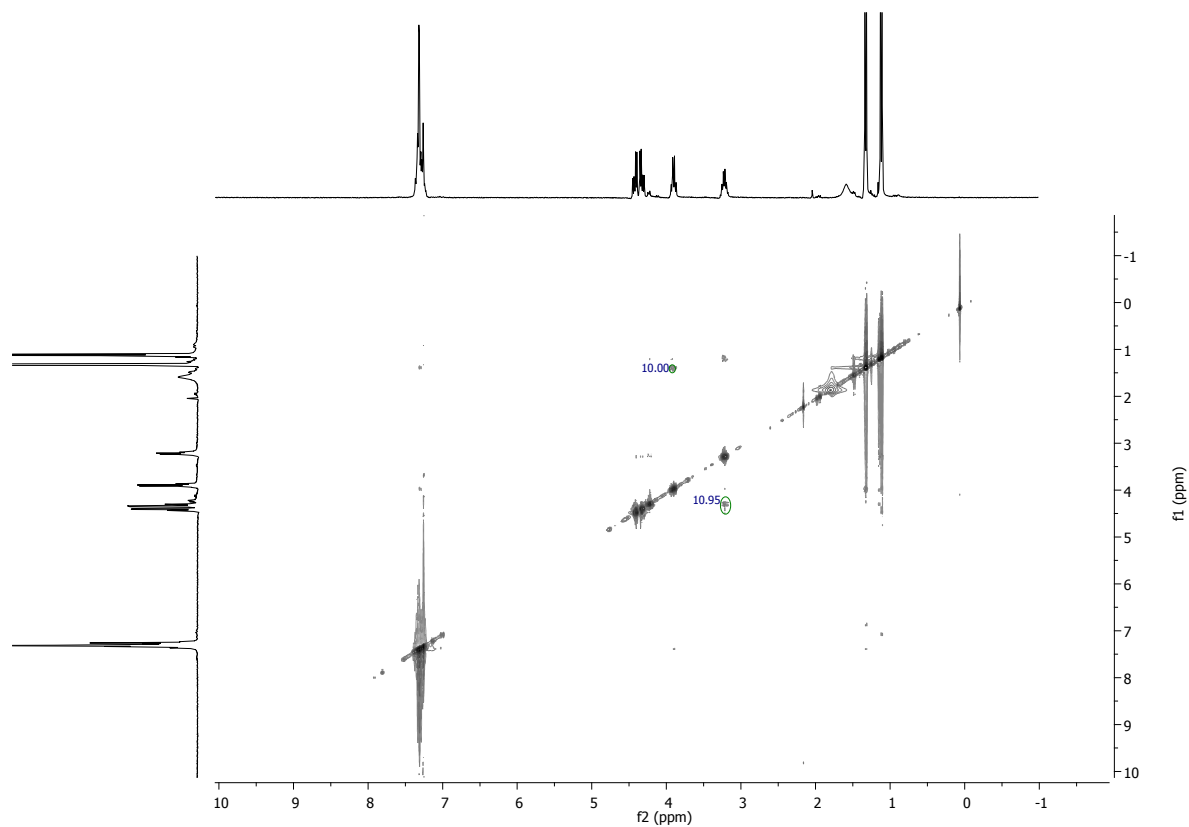

NOESY spectrum of **7'g**. The cross peak between the protons  $H_b$  and  $H_c$  was used as a distance ruler and its volume was set to 10.00 a.u.; the cross peak between  $H_b$  and  $H_a$  was measured 10.95 a. u. (corresponding to an interproton distance of 2.64 Å), in order to determine the absolute configuration.

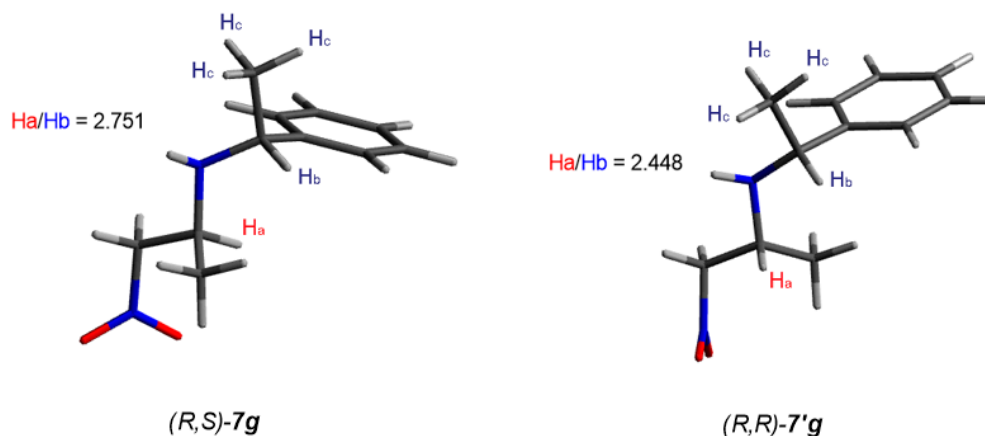

**Figure S1.** Optimized geometries of all diastereomers. By NOESY analysis coupled with computational studies absolute configurations can be assigned to  $C_{\beta}$ .

### Calculated Coordinates:

#### (R,S)-7g

|    |   |   |           |           |           |
|----|---|---|-----------|-----------|-----------|
| 1  | 7 | 0 | -0.376091 | 1.362491  | -0.550683 |
| 2  | 6 | 0 | 0.935424  | 1.594949  | 0.076696  |
| 3  | 6 | 0 | 1.636075  | 2.740276  | -0.670570 |
| 4  | 6 | 0 | -1.312062 | 0.542742  | 0.228225  |
| 5  | 6 | 0 | -2.309651 | -0.043292 | -0.784649 |
| 6  | 7 | 0 | -3.279911 | -0.992602 | -0.134924 |
| 7  | 8 | 0 | -2.808885 | -1.902190 | 0.546287  |
| 8  | 8 | 0 | -4.480336 | -0.811940 | -0.325692 |
| 9  | 6 | 0 | 1.786403  | 0.330086  | 0.055996  |
| 10 | 6 | 0 | 1.856332  | -0.475798 | -1.089082 |
| 11 | 6 | 0 | 2.681205  | -1.600398 | -1.117826 |
| 12 | 6 | 0 | 3.450909  | -1.937478 | -0.001160 |
| 13 | 6 | 0 | 3.386179  | -1.143788 | 1.144874  |
| 14 | 6 | 0 | 2.556610  | -0.020389 | 1.171209  |
| 15 | 6 | 0 | -2.015440 | 1.292606  | 1.369033  |
| 16 | 1 | 0 | -1.777874 | -0.628666 | -1.536795 |
| 17 | 1 | 0 | -2.917743 | 0.722258  | -1.266969 |
| 18 | 1 | 0 | -0.807112 | 2.262839  | -0.750842 |
| 19 | 1 | 0 | 1.249933  | -0.217298 | -1.951511 |
| 20 | 1 | 0 | 2.722872  | -2.216197 | -2.011980 |
| 21 | 1 | 0 | 4.091148  | -2.814564 | -0.023277 |
| 22 | 1 | 0 | 3.974627  | -1.401344 | 2.020897  |
| 23 | 1 | 0 | 2.505386  | 0.591195  | 2.069121  |
| 24 | 1 | 0 | 0.834121  | 1.903336  | 1.131735  |
| 25 | 1 | 0 | 1.761003  | 2.487868  | -1.727981 |
| 26 | 1 | 0 | 2.623186  | 2.930052  | -0.241371 |
| 27 | 1 | 0 | 1.051998  | 3.665297  | -0.601348 |
| 28 | 1 | 0 | -0.744224 | -0.295839 | 0.641749  |
| 29 | 1 | 0 | -2.633230 | 2.109305  | 0.977422  |
| 30 | 1 | 0 | -1.280776 | 1.721069  | 2.056406  |
| 31 | 1 | 0 | -2.659433 | 0.627408  | 1.952750  |

$(R,R)$ -7<sup>1</sup>g

---

|    |   |   |           |           |           |
|----|---|---|-----------|-----------|-----------|
| 1  | 7 | 0 | -0.441072 | 1.025516  | -0.549890 |
| 2  | 6 | 0 | 0.769770  | 1.400871  | 0.205832  |
| 3  | 6 | 0 | 1.280035  | 2.753952  | -0.320231 |
| 4  | 6 | 0 | -1.463508 | 0.290976  | 0.207767  |
| 5  | 6 | 0 | -2.662160 | 0.131730  | -0.748793 |
| 6  | 7 | 0 | -3.843810 | -0.440057 | -0.021308 |
| 7  | 8 | 0 | -4.200586 | -1.581787 | -0.303617 |
| 8  | 8 | 0 | -4.370823 | 0.268290  | 0.835360  |
| 9  | 6 | 0 | 1.876613  | 0.354989  | 0.100031  |
| 10 | 6 | 0 | 2.102761  | -0.344665 | -1.091810 |
| 11 | 6 | 0 | 3.161458  | -1.248011 | -1.196104 |
| 12 | 6 | 0 | 4.012166  | -1.465134 | -0.109355 |
| 13 | 6 | 0 | 3.795000  | -0.772376 | 1.083158  |
| 14 | 6 | 0 | 2.734482  | 0.130341  | 1.184076  |
| 15 | 1 | 0 | -1.816572 | 0.867409  | 1.080400  |
| 16 | 1 | 0 | -2.437003 | -0.546477 | -1.570013 |
| 17 | 1 | 0 | -2.994978 | 1.100719  | -1.127582 |
| 18 | 1 | 0 | -0.866729 | 1.884118  | -0.891168 |
| 19 | 1 | 0 | 1.429827  | -0.184565 | -1.927930 |
| 20 | 1 | 0 | 3.321146  | -1.785949 | -2.126563 |
| 21 | 1 | 0 | 4.833737  | -2.170966 | -0.189880 |
| 22 | 1 | 0 | 4.446588  | -0.937581 | 1.936574  |
| 23 | 1 | 0 | 2.568696  | 0.664114  | 2.117458  |
| 24 | 1 | 0 | 0.531976  | 1.531370  | 1.275622  |
| 25 | 1 | 0 | 1.492855  | 2.689512  | -1.392382 |
| 26 | 1 | 0 | 2.201100  | 3.042324  | 0.192065  |
| 27 | 1 | 0 | 0.536389  | 3.542429  | -0.157507 |
| 28 | 6 | 0 | -0.966355 | -1.071978 | 0.695517  |
| 29 | 1 | 0 | -0.603753 | -1.674177 | -0.142498 |
| 30 | 1 | 0 | -1.770995 | -1.617146 | 1.197624  |
| 31 | 1 | 0 | -0.148412 | -0.959528 | 1.409699  |

---

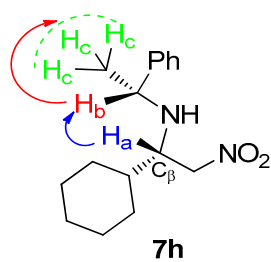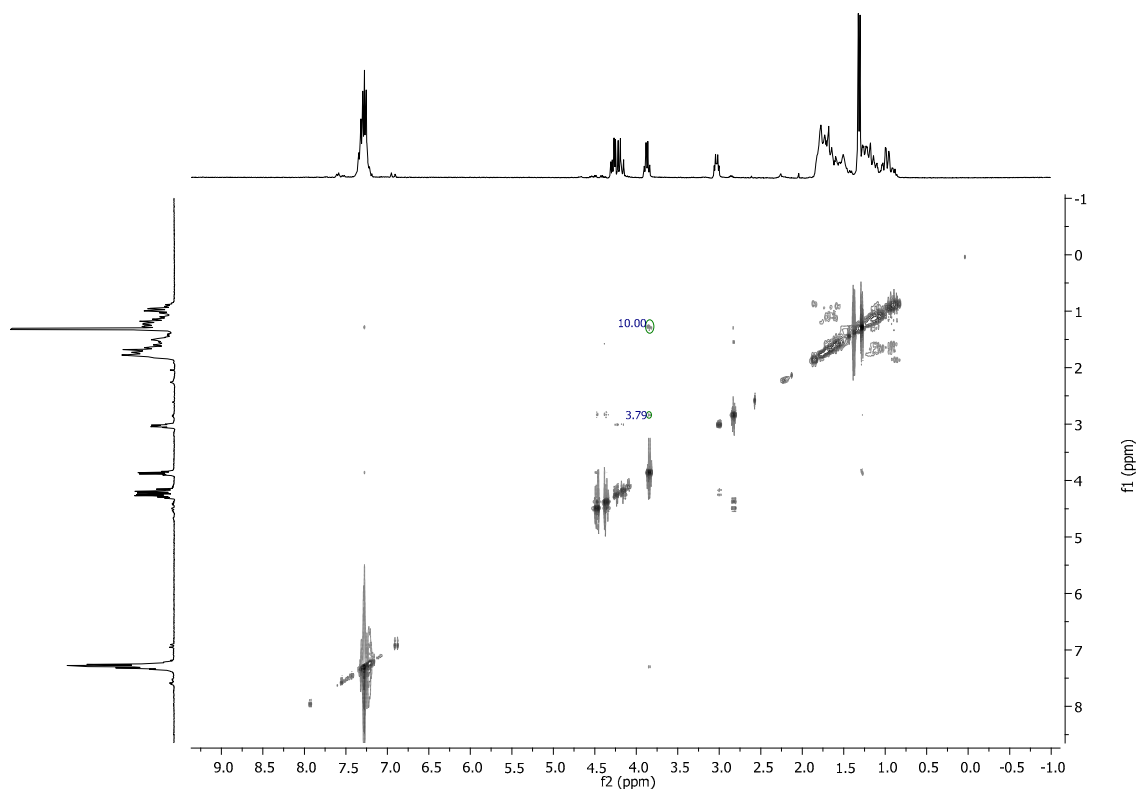

NOESY spectrum of **7h**. The cross peak between the protons H<sub>b</sub> and H<sub>c</sub> was used as a distance ruler and its volume was set to 10.00 a.u.; the cross peak between H<sub>b</sub> and H<sub>a</sub> was measured 3.79 a. u. (corresponding to an interproton distance of 3.15 Å), in order to determine the absolute configuration.

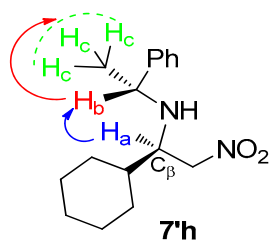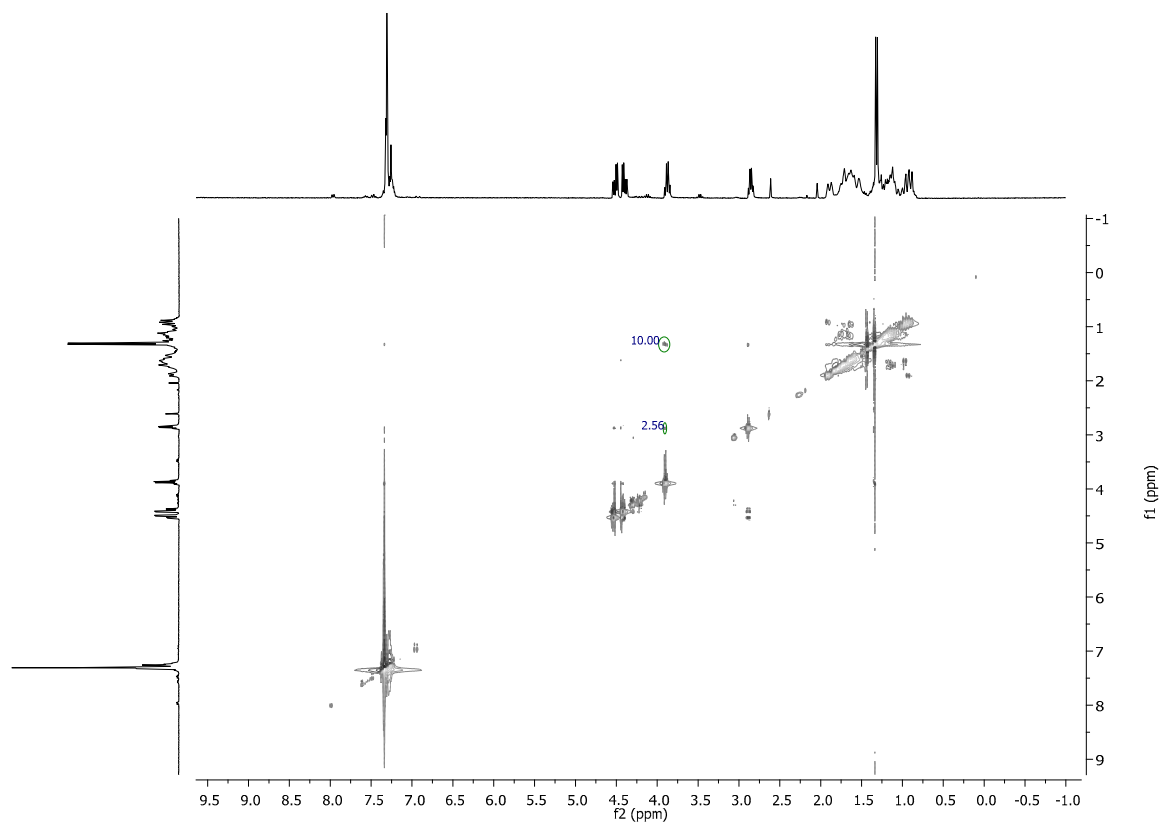

NOESY spectrum of **7'h**. The cross peak between the protons H<sub>b</sub> and H<sub>c</sub> was used as a distance ruler and its volume was set to 10.00 a.u.; the cross peak between H<sub>b</sub> and H<sub>a</sub> was measured 2.56 a. u. (corresponding to an interproton distance of 3.36 Å), in order to determine the absolute configuration.

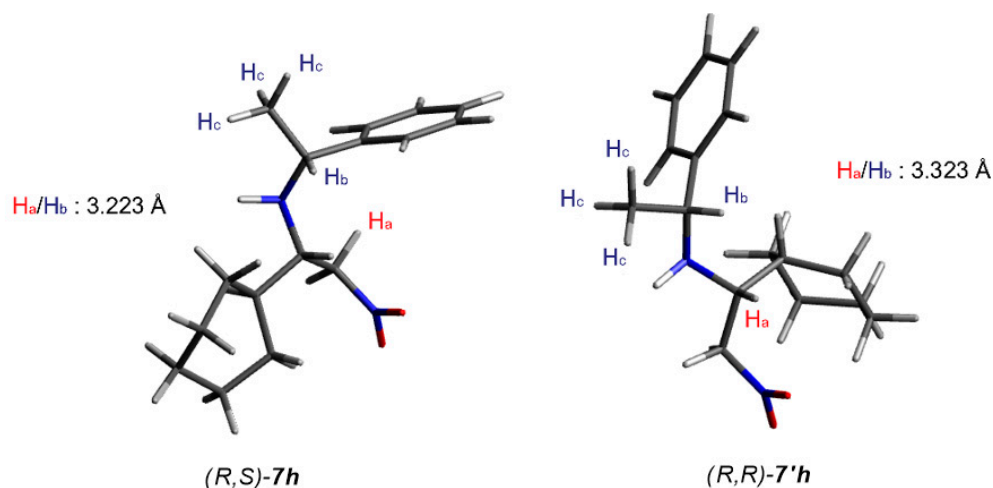

**Figure S2.** Optimized geometries of all diastereomers. By NOESY analysis coupled with computational studies absolute configurations can be assigned to  $C_{\beta}$ .

### Calculated Coordinates:

#### (*R,S*)-7h

| Center Number | Atomic Number | Atomic Type | Coordinates (Angstroms) |           |           |
|---------------|---------------|-------------|-------------------------|-----------|-----------|
|               |               |             | X                       | Y         | Z         |
| 1             | 7             | 0           | -0.213440               | -1.114666 | -0.828797 |
| 2             | 6             | 0           | -1.265023               | -1.741176 | -0.011376 |
| 3             | 6             | 0           | -1.617289               | -3.106151 | -0.621569 |
| 4             | 6             | 0           | 0.551426                | -0.026131 | -0.192994 |
| 5             | 6             | 0           | 2.070150                | -0.290496 | -0.324833 |
| 6             | 6             | 0           | 2.462672                | -1.585403 | 0.450786  |
| 7             | 6             | 0           | 3.927328                | -1.584384 | 0.939347  |
| 8             | 6             | 0           | 4.839346                | -0.886786 | -0.074352 |
| 9             | 6             | 0           | 4.456856                | 0.605182  | -0.214514 |
| 10            | 6             | 0           | 2.970073                | 0.878078  | 0.117624  |
| 11            | 6             | 0           | 0.087323                | 1.292408  | -0.846489 |
| 12            | 7             | 0           | 0.333738                | 2.520914  | -0.007545 |
| 13            | 8             | 0           | 0.132626                | 2.443101  | 1.202964  |
| 14            | 8             | 0           | 0.681863                | 3.547842  | -0.588851 |
| 15            | 6             | 0           | -2.506161               | -0.859673 | 0.093861  |
| 16            | 6             | 0           | -3.111115               | -0.327516 | -1.055009 |
| 17            | 6             | 0           | -4.273500               | 0.437476  | -0.959083 |
| 18            | 6             | 0           | -4.852862               | 0.681935  | 0.289582  |
| 19            | 6             | 0           | -4.258884               | 0.158784  | 1.438274  |
| 20            | 6             | 0           | -3.092649               | -0.604619 | 1.338034  |
| 21            | 1             | 0           | -0.996907               | 1.267663  | -0.970798 |
| 22            | 1             | 0           | 0.556706                | 1.486659  | -1.810711 |
| 23            | 1             | 0           | 0.422560                | -1.835540 | -1.150437 |
| 24            | 1             | 0           | -2.656101               | -0.510315 | -2.024287 |
| 25            | 1             | 0           | -4.728373               | 0.843649  | -1.858197 |
| 26            | 1             | 0           | -5.756735               | 1.279304  | 0.364786  |
| 27            | 1             | 0           | -4.697139               | 0.348889  | 2.413822  |
| 28            | 1             | 0           | -2.631688               | -1.005123 | 2.237704  |
| 29            | 1             | 0           | -0.905691               | -1.917018 | 1.017922  |
| 30            | 1             | 0           | -1.971262               | -2.990622 | -1.650551 |
| 31            | 1             | 0           | -2.404029               | -3.593562 | -0.040112 |
| 32            | 1             | 0           | -0.741606               | -3.765365 | -0.629140 |
| 33            | 1             | 0           | 2.263502                | -0.452945 | -1.397168 |
| 34            | 1             | 0           | 1.795170                | -1.709339 | 1.312503  |
| 35            | 1             | 0           | 2.305166                | -2.461167 | -0.189845 |

|    |   |   |          |           |           |
|----|---|---|----------|-----------|-----------|
| 36 | 1 | 0 | 3.999038 | -1.065794 | 1.903817  |
| 37 | 1 | 0 | 4.256276 | -2.613669 | 1.120117  |
| 38 | 1 | 0 | 5.891106 | -0.983267 | 0.216291  |
| 39 | 1 | 0 | 4.742512 | -1.393061 | -1.043907 |
| 40 | 1 | 0 | 5.079967 | 1.215709  | 0.448843  |
| 41 | 1 | 0 | 4.671515 | 0.944484  | -1.234630 |
| 42 | 1 | 0 | 2.845880 | 1.037528  | 1.195917  |
| 43 | 1 | 0 | 2.676501 | 1.812310  | -0.368459 |
| 44 | 1 | 0 | 0.299490 | 0.040152  | 0.874269  |

---

**(R,R)-7'h**

|    |   |   |           |           |           |
|----|---|---|-----------|-----------|-----------|
| 1  | 7 | 0 | 0.437866  | 1.527660  | -0.534054 |
| 2  | 6 | 0 | 1.637761  | 1.642351  | 0.320527  |
| 3  | 6 | 0 | 2.348847  | 2.971569  | 0.008495  |
| 4  | 6 | 0 | -0.773329 | 0.993161  | 0.121625  |
| 5  | 6 | 0 | -0.594314 | -0.527419 | 0.417355  |
| 6  | 6 | 0 | -1.476451 | -1.098796 | 1.561199  |
| 7  | 6 | 0 | -2.814415 | -1.737226 | 1.148004  |
| 8  | 6 | 0 | -2.629817 | -2.728220 | -0.008544 |
| 9  | 6 | 0 | -1.967304 | -2.038832 | -1.208373 |
| 10 | 6 | 0 | -0.598827 | -1.441791 | -0.833162 |
| 11 | 6 | 0 | -1.932654 | 1.394519  | -0.808006 |
| 12 | 7 | 0 | -3.289123 | 1.302378  | -0.166942 |
| 13 | 8 | 0 | -4.202243 | 0.826476  | -0.838941 |
| 14 | 8 | 0 | -3.417541 | 1.735654  | 0.975516  |
| 15 | 6 | 0 | 2.616567  | 0.483794  | 0.140597  |
| 16 | 6 | 0 | 2.864238  | -0.067251 | -1.123178 |
| 17 | 6 | 0 | 3.815234  | -1.075505 | -1.285892 |
| 18 | 6 | 0 | 4.535451  | -1.548789 | -0.186115 |
| 19 | 6 | 0 | 4.296193  | -1.006423 | 1.077803  |
| 20 | 6 | 0 | 3.343751  | 0.002432  | 1.236807  |
| 21 | 1 | 0 | -0.951153 | 1.495652  | 1.086768  |
| 22 | 1 | 0 | -1.981706 | 0.808215  | -1.721824 |
| 23 | 1 | 0 | -1.847362 | 2.453956  | -1.070720 |
| 24 | 1 | 0 | 0.227274  | 2.456530  | -0.887463 |
| 25 | 1 | 0 | 2.293350  | 0.293733  | -1.972577 |
| 26 | 1 | 0 | 3.993157  | -1.494561 | -2.272479 |
| 27 | 1 | 0 | 5.272745  | -2.336220 | -0.312773 |
| 28 | 1 | 0 | 4.845966  | -1.370893 | 1.940999  |
| 29 | 1 | 0 | 3.159823  | 0.418443  | 2.225040  |
| 30 | 1 | 0 | 1.342222  | 1.668532  | 1.382664  |
| 31 | 1 | 0 | 2.625129  | 3.015594  | -1.050477 |
| 32 | 1 | 0 | 3.262933  | 3.067998  | 0.599557  |
| 33 | 1 | 0 | 1.700085  | 3.824542  | 0.237233  |
| 34 | 1 | 0 | -0.885263 | -1.883846 | 2.051558  |
| 35 | 1 | 0 | -1.643475 | -0.327743 | 2.322993  |
| 36 | 1 | 0 | 0.084995  | -2.277637 | -0.635573 |
| 37 | 1 | 0 | -0.165329 | -0.897567 | -1.679540 |
| 38 | 1 | 0 | -3.545979 | -0.976919 | 0.855281  |
| 39 | 1 | 0 | -3.244592 | -2.245218 | 2.019677  |
| 40 | 1 | 0 | -3.595809 | -3.156979 | -0.300098 |
| 41 | 1 | 0 | -1.999903 | -3.566049 | 0.324114  |
| 42 | 1 | 0 | -2.648845 | -1.265026 | -1.583481 |
| 43 | 1 | 0 | -1.831918 | -2.750981 | -2.031472 |
| 44 | 1 | 0 | 0.425147  | -0.566294 | 0.812118  |

---

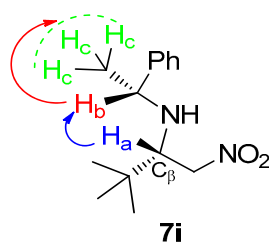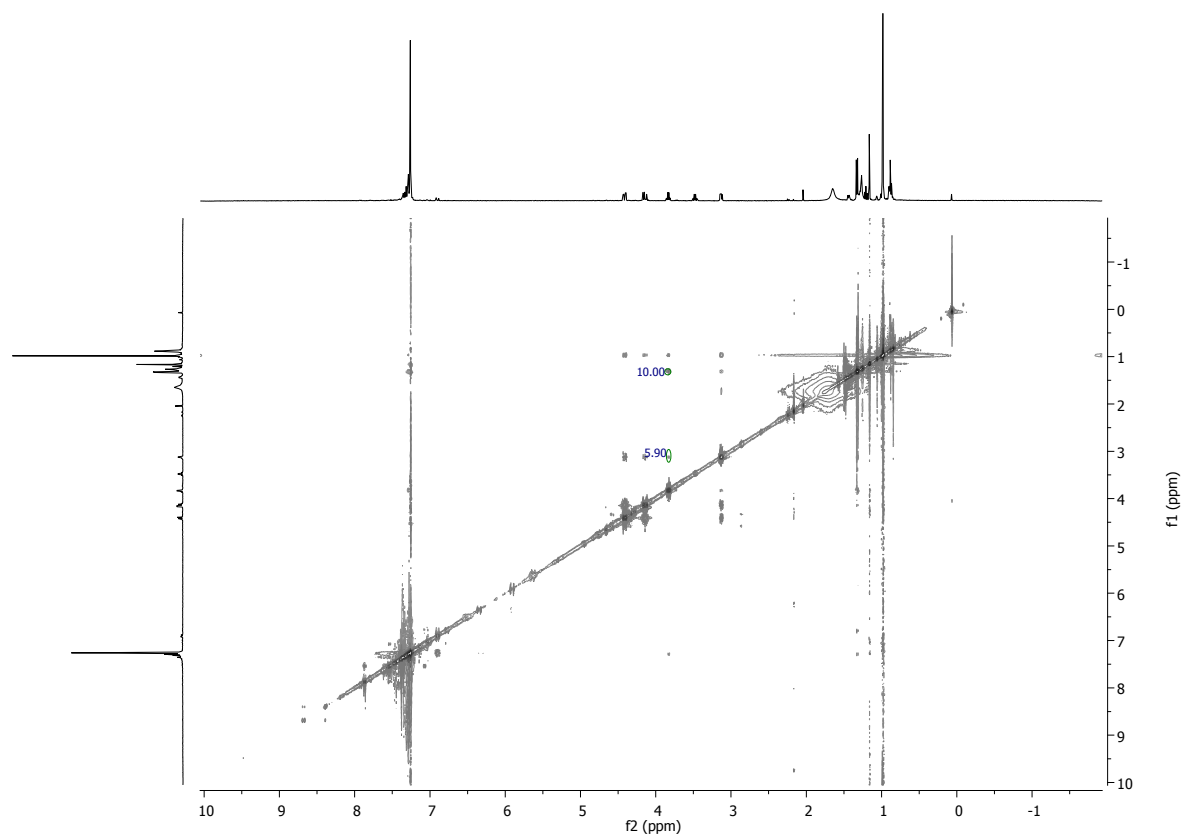

NOESY spectrum of **7i**. The cross peak between the protons  $H_b$  and  $H_c$  was used as a distance ruler and its volume was set to 10.00 a.u.; the cross peak between  $H_b$  and  $H_a$  was measured 5.90 a. u. (corresponding to an interproton distance of 2.92 Å), in order to determine the absolute configuration.



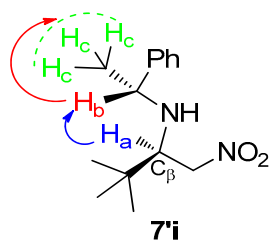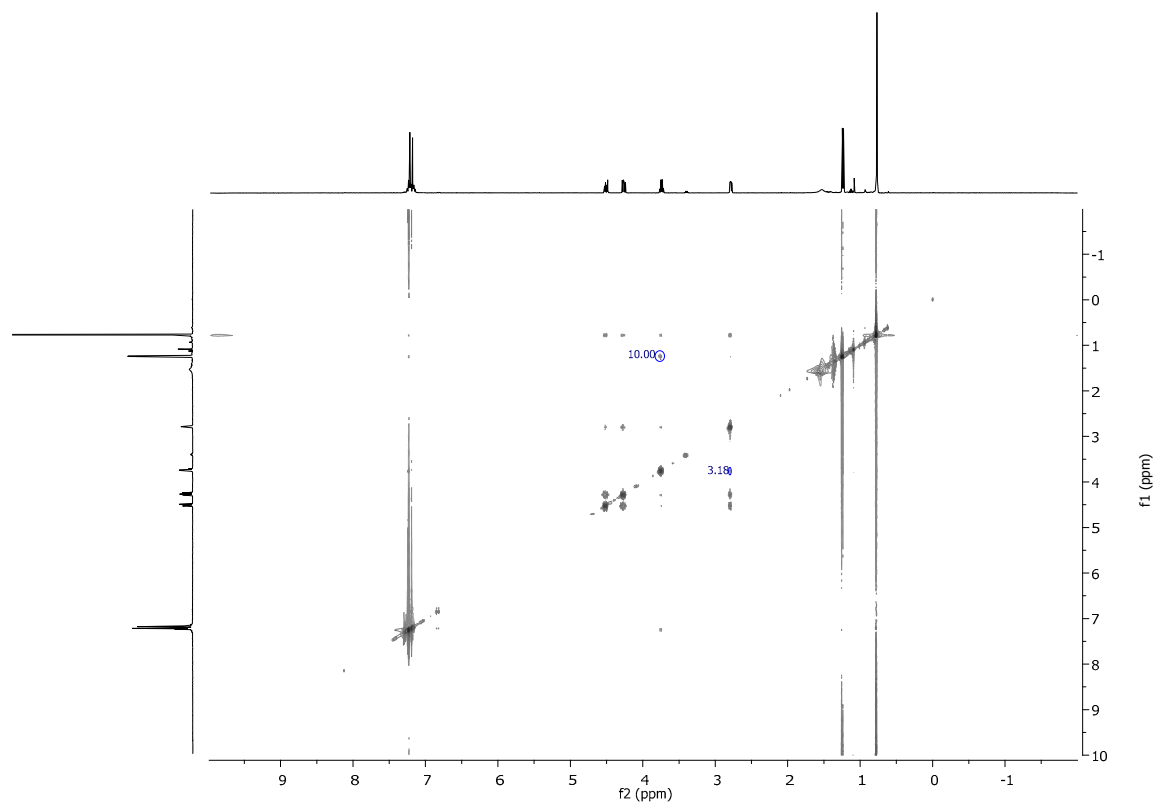

NOESY spectrum of **7i**. The cross peak between the protons  $H_b$  and  $H_c$  was used as a distance ruler and its volume was set to 10.00 a.u.; the cross peak between  $H_b$  and  $H_a$  was measured 3.18 a. u. (corresponding to an interproton distance of 3.24 Å), in order to determine the absolute configuration.

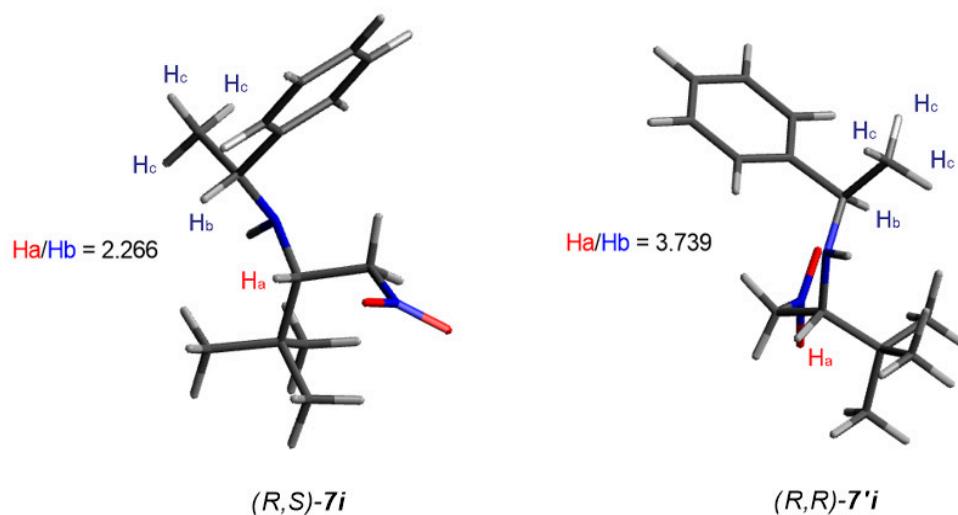

**Figure S3.** Optimized geometries of all diastereomers. By NOESY analysis coupled with computational studies absolute configurations can be assigned to  $C_{\beta}$ .

### Calculated Coordinates:

#### (R,S)-7i

| Center Number | Atomic Number | Atomic Type | Coordinates (Angstroms) |           |           |
|---------------|---------------|-------------|-------------------------|-----------|-----------|
|               |               |             | X                       | Y         | Z         |
| 1             | 6             | 0           | -2.663933               | -0.206895 | 1.283850  |
| 2             | 6             | 0           | -2.017982               | -0.687757 | 0.139884  |
| 3             | 6             | 0           | -2.470957               | -0.258861 | -1.117004 |
| 4             | 6             | 0           | -3.543302               | 0.626715  | -1.224020 |
| 5             | 6             | 0           | -4.183349               | 1.097541  | -0.073719 |
| 6             | 6             | 0           | -3.740215               | 0.678494  | 1.180918  |
| 7             | 6             | 0           | -0.882674               | -1.700545 | 0.258570  |
| 8             | 6             | 0           | -1.349856               | -3.091520 | -0.197485 |
| 9             | 7             | 0           | 0.291684                | -1.307351 | -0.537496 |
| 10            | 6             | 0           | 1.137533                | -0.248412 | 0.039168  |
| 11            | 6             | 0           | 0.863312                | 1.037316  | -0.776126 |
| 12            | 7             | 0           | 1.156912                | 2.317648  | -0.036782 |
| 13            | 8             | 0           | 0.777148                | 2.407997  | 1.129344  |
| 14            | 6             | 0           | 2.645927                | -0.664198 | 0.111615  |
| 15            | 6             | 0           | 3.199954                | -1.079378 | -1.267958 |
| 16            | 6             | 0           | 2.785080                | -1.844758 | 1.097586  |
| 17            | 6             | 0           | 3.498847                | 0.503185  | 0.651014  |
| 18            | 8             | 0           | 1.722451                | 3.218800  | -0.654413 |
| 19            | 1             | 0           | 0.813912                | -0.034730 | 1.067250  |
| 20            | 1             | 0           | -0.205595               | 1.093321  | -0.987716 |
| 21            | 1             | 0           | 1.419385                | 1.095183  | -1.709819 |
| 22            | 1             | 0           | 0.847060                | -2.133218 | -0.725627 |
| 23            | 1             | 0           | -1.967910               | -0.617590 | -2.010390 |
| 24            | 1             | 0           | -3.880494               | 0.950388  | -2.204751 |
| 25            | 1             | 0           | -5.017133               | 1.788492  | -0.156619 |
| 26            | 1             | 0           | -4.226171               | 1.043959  | 2.081007  |
| 27            | 1             | 0           | -2.320070               | -0.525741 | 2.264897  |
| 28            | 1             | 0           | -0.620623               | -1.769612 | 1.328948  |
| 29            | 1             | 0           | -1.608801               | -3.084136 | -1.260699 |
| 30            | 1             | 0           | -2.232043               | -3.401901 | 0.368137  |
| 31            | 1             | 0           | -0.563737               | -3.838594 | -0.037985 |
| 32            | 1             | 0           | 2.424342                | -1.567951 | 2.094096  |
| 33            | 1             | 0           | 3.836241                | -2.135590 | 1.191146  |
| 34            | 1             | 0           | 2.230208                | -2.731582 | 0.775232  |

|    |   |   |          |           |           |
|----|---|---|----------|-----------|-----------|
| 35 | 1 | 0 | 3.125878 | 0.863302  | 1.615070  |
| 36 | 1 | 0 | 3.531716 | 1.348229  | -0.042609 |
| 37 | 1 | 0 | 4.531131 | 0.168948  | 0.796074  |
| 38 | 1 | 0 | 2.666429 | -1.931596 | -1.701103 |
| 39 | 1 | 0 | 4.250247 | -1.372638 | -1.170355 |
| 40 | 1 | 0 | 3.158748 | -0.258972 | -1.991448 |

---

(R,R)-7<sup>i</sup>

---

| Center Number | Atomic Number | Atomic Type | Coordinates (Angstroms) |           |           |
|---------------|---------------|-------------|-------------------------|-----------|-----------|
|               |               |             | X                       | Y         | Z         |
| 1             | 7             | 0           | 0.295280                | -1.226288 | -0.608629 |
| 2             | 6             | 0           | 1.401163                | -0.309686 | -0.891840 |
| 3             | 6             | 0           | 2.757402                | -0.528053 | -0.111996 |
| 4             | 6             | 0           | 2.658193                | -0.324815 | 1.413401  |
| 5             | 6             | 0           | 3.832839                | 0.415237  | -0.693425 |
| 6             | 6             | 0           | 3.214477                | -1.980631 | -0.370895 |
| 7             | 6             | 0           | 0.920725                | 1.157784  | -1.056608 |
| 8             | 7             | 0           | 0.944093                | 2.054060  | 0.160435  |
| 9             | 1             | 0           | -0.118135               | 1.153712  | -1.388980 |
| 10            | 1             | 0           | 1.544710                | 1.681727  | -1.775827 |
| 11            | 8             | 0           | 1.769540                | 2.967644  | 0.172434  |
| 12            | 8             | 0           | 0.135426                | 1.850605  | 1.062232  |
| 13            | 6             | 0           | -0.612569               | -1.106376 | 0.540403  |
| 14            | 1             | 0           | 0.600009                | -2.181462 | -0.739508 |
| 15            | 6             | 0           | -1.964217               | -0.497058 | 0.148097  |
| 16            | 6             | 0           | -2.484734               | -0.634058 | -1.143894 |
| 17            | 1             | 0           | -1.880653               | -1.131016 | -1.896342 |
| 18            | 6             | 0           | -3.747635               | -0.128729 | -1.463510 |
| 19            | 1             | 0           | -4.134792               | -0.243681 | -2.472475 |
| 20            | 6             | 0           | -4.510272               | 0.522920  | -0.492873 |
| 21            | 1             | 0           | -5.490599               | 0.919560  | -0.741003 |
| 22            | 6             | 0           | -3.998738               | 0.667994  | 0.799483  |
| 23            | 1             | 0           | -4.579425               | 1.182326  | 1.560270  |
| 24            | 6             | 0           | -2.736861               | 0.162987  | 1.113577  |
| 25            | 1             | 0           | -2.340810               | 0.290634  | 2.118233  |
| 26            | 1             | 0           | -0.183875               | -0.462436 | 1.313509  |
| 27            | 6             | 0           | -0.836418               | -2.499367 | 1.156411  |
| 28            | 1             | 0           | -1.227348               | -3.191321 | 0.401437  |
| 29            | 1             | 0           | -1.562964               | -2.452361 | 1.971551  |
| 30            | 1             | 0           | 0.100066                | -2.907848 | 1.551920  |
| 31            | 1             | 0           | 2.412285                | 0.700930  | 1.696194  |
| 32            | 1             | 0           | 3.623698                | -0.561458 | 1.873881  |
| 33            | 1             | 0           | 1.914181                | -0.990635 | 1.859529  |
| 34            | 1             | 0           | 3.621578                | 1.465743  | -0.479730 |
| 35            | 1             | 0           | 3.918174                | 0.296853  | -1.780375 |
| 36            | 1             | 0           | 4.810752                | 0.180019  | -0.260650 |
| 37            | 1             | 0           | 2.529933                | -2.712762 | 0.069261  |
| 38            | 1             | 0           | 4.198902                | -2.149838 | 0.076880  |
| 39            | 1             | 0           | 3.297130                | -2.191462 | -1.443644 |
| 40            | 1             | 0           | 1.671716                | -0.544532 | -1.932085 |

---

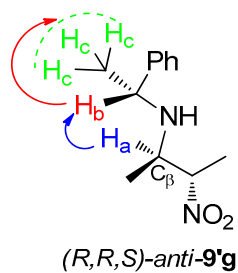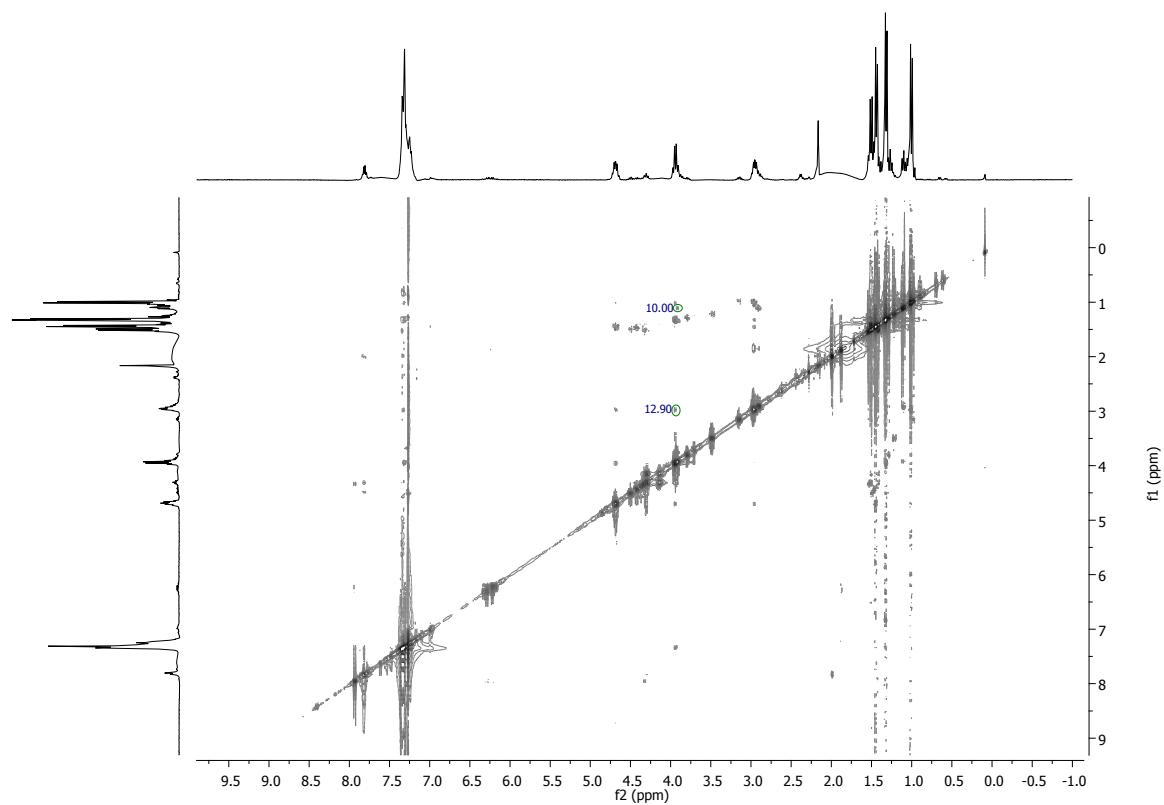

NOESY spectrum of anti-9'g. The cross peak between the protons H<sub>b</sub> and H<sub>c</sub> was used as a distance ruler and its volume was set to 10.00 a.u.; the cross peak between H<sub>b</sub> and H<sub>a</sub> was measured 12.90 a. u. (corresponding to an interproton distance of 2.56 Å), in order to determine the absolute configuration.

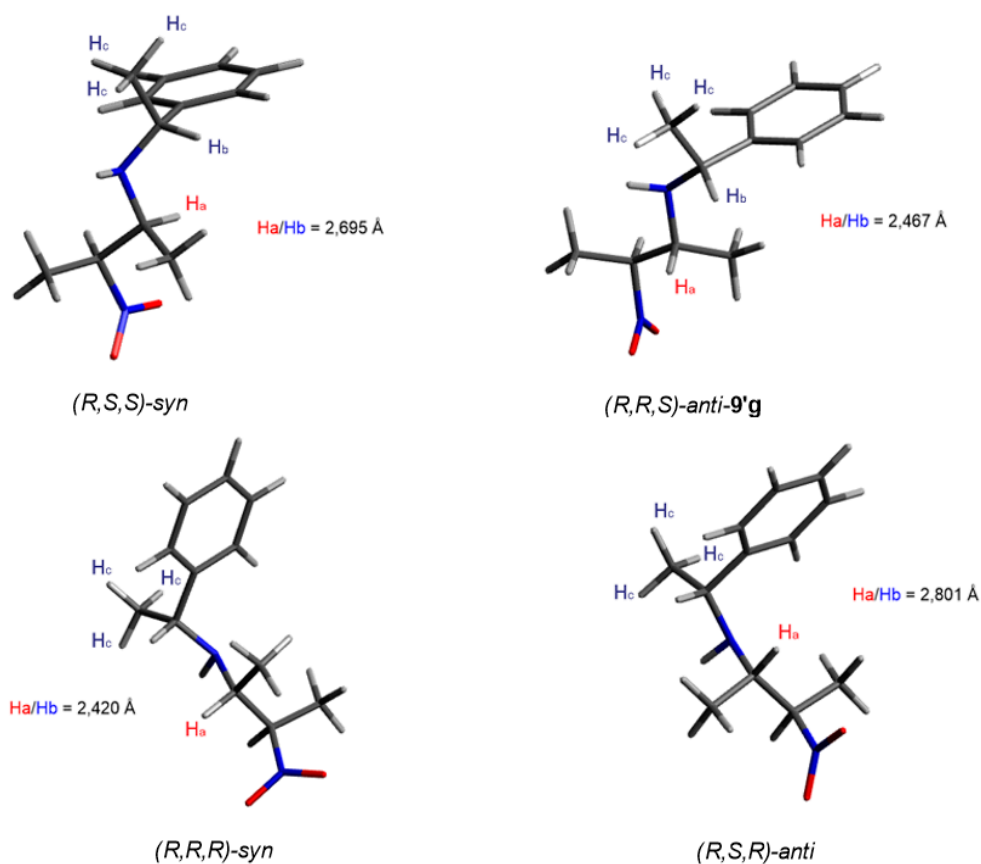

**Figure S4.** Optimized geometries of all diastereomers. By NOESY analysis coupled with computational studies absolute configurations can be assigned to  $C_{\beta}$ .

### Calculated Coordinates:

#### (*R,S,S*)-syn

|    |   |   |           |           |           |
|----|---|---|-----------|-----------|-----------|
| 1  | 7 | 0 | -0.260449 | 1.380576  | -0.333699 |
| 2  | 6 | 0 | 1.068448  | 1.592715  | 0.265234  |
| 3  | 6 | 0 | 1.708780  | 2.822528  | -0.396926 |
| 4  | 6 | 0 | -1.141266 | 0.464926  | 0.400941  |
| 5  | 6 | 0 | -2.105035 | -0.180591 | -0.637714 |
| 6  | 7 | 0 | -2.879479 | -1.278634 | 0.075924  |
| 7  | 8 | 0 | -2.238716 | -2.272133 | 0.417110  |
| 8  | 8 | 0 | -4.075881 | -1.113254 | 0.304484  |
| 9  | 6 | 0 | 1.951571  | 0.361333  | 0.097822  |
| 10 | 6 | 0 | 1.999073  | -0.335219 | -1.117919 |
| 11 | 6 | 0 | 2.852236  | -1.427096 | -1.278820 |
| 12 | 6 | 0 | 3.672987  | -1.840366 | -0.225937 |
| 13 | 6 | 0 | 3.630878  | -1.155892 | 0.989500  |
| 14 | 6 | 0 | 2.773239  | -0.064934 | 1.147967  |
| 15 | 6 | 0 | -1.864824 | 1.114077  | 1.590329  |
| 16 | 1 | 0 | -1.484746 | -0.725464 | -1.351380 |
| 17 | 6 | 0 | -3.047326 | 0.774464  | -1.351102 |
| 18 | 1 | 0 | -0.719407 | 2.283472  | -0.429764 |
| 19 | 1 | 0 | 1.353189  | -0.018011 | -1.930738 |
| 20 | 1 | 0 | 2.875785  | -1.958292 | -2.226275 |
| 21 | 1 | 0 | 4.334868  | -2.692379 | -0.350911 |
| 22 | 1 | 0 | 4.258973  | -1.473631 | 1.816879  |
| 23 | 1 | 0 | 2.740345  | 0.461117  | 2.099303  |

|    |   |   |           |           |           |
|----|---|---|-----------|-----------|-----------|
| 24 | 1 | 0 | 0.997911  | 1.799517  | 1.347365  |
| 25 | 1 | 0 | 1.801529  | 2.670950  | -1.476637 |
| 26 | 1 | 0 | 2.705361  | 3.003500  | 0.013764  |
| 27 | 1 | 0 | 1.101899  | 3.718779  | -0.223346 |
| 28 | 1 | 0 | -0.516424 | -0.353529 | 0.770946  |
| 29 | 1 | 0 | -2.498952 | 1.947054  | 1.269188  |
| 30 | 1 | 0 | -1.132289 | 1.506529  | 2.301292  |
| 31 | 1 | 0 | -2.494172 | 0.399152  | 2.128932  |
| 32 | 1 | 0 | -3.678624 | 0.238954  | -2.063681 |
| 33 | 1 | 0 | -2.445497 | 1.496984  | -1.907855 |
| 34 | 1 | 0 | -3.696042 | 1.309142  | -0.655660 |

---

*(R,R,S)-anti-9<sup>l</sup>g*

|    |   |   |           |           |           |
|----|---|---|-----------|-----------|-----------|
| 1  | 7 | 0 | 0.278066  | 1.018887  | 0.311285  |
| 2  | 6 | 0 | -0.949371 | 1.307884  | -0.457537 |
| 3  | 6 | 0 | -1.406636 | 2.740901  | -0.132043 |
| 4  | 6 | 0 | 1.266201  | 0.162219  | -0.359430 |
| 5  | 6 | 0 | 2.496551  | 0.054935  | 0.580872  |
| 6  | 7 | 0 | 3.535761  | -0.806253 | -0.111399 |
| 7  | 8 | 0 | 3.794350  | -1.903215 | 0.378433  |
| 8  | 8 | 0 | 4.054761  | -0.357846 | -1.132933 |
| 9  | 6 | 0 | -2.079969 | 0.326604  | -0.158083 |
| 10 | 6 | 0 | -2.272346 | -0.189993 | 1.129139  |
| 11 | 6 | 0 | -3.352414 | -1.030234 | 1.404143  |
| 12 | 6 | 0 | -4.257777 | -1.366711 | 0.394848  |
| 13 | 6 | 0 | -4.074164 | -0.857111 | -0.891958 |
| 14 | 6 | 0 | -2.992510 | -0.016914 | -1.163471 |
| 15 | 1 | 0 | 1.621324  | 0.614609  | -1.302561 |
| 16 | 1 | 0 | 2.228124  | -0.511019 | 1.473615  |
| 17 | 6 | 0 | 3.156100  | 1.384378  | 0.946956  |
| 18 | 1 | 0 | 0.722179  | 1.910961  | 0.504775  |
| 19 | 1 | 0 | -1.556795 | 0.061792  | 1.905095  |
| 20 | 1 | 0 | -3.485831 | -1.425750 | 2.407335  |
| 21 | 1 | 0 | -5.095802 | -2.023905 | 0.608185  |
| 22 | 1 | 0 | -4.768556 | -1.117421 | -1.685859 |
| 23 | 1 | 0 | -2.852769 | 0.373585  | -2.169233 |
| 24 | 1 | 0 | -0.745949 | 1.265746  | -1.541242 |
| 25 | 1 | 0 | -1.582308 | 2.849040  | 0.943397  |
| 26 | 1 | 0 | -2.338156 | 2.975462  | -0.652981 |
| 27 | 1 | 0 | -0.649967 | 3.472161  | -0.438757 |
| 28 | 6 | 0 | 0.698673  | -1.225318 | -0.675267 |
| 29 | 1 | 0 | 0.359022  | -1.724097 | 0.237086  |
| 30 | 1 | 0 | 1.452402  | -1.852377 | -1.158943 |
| 31 | 1 | 0 | -0.151277 | -1.154136 | -1.356010 |
| 32 | 1 | 0 | 4.090391  | 1.213930  | 1.488534  |
| 33 | 1 | 0 | 2.498333  | 1.950357  | 1.610267  |
| 34 | 1 | 0 | 3.371925  | 1.977278  | 0.055092  |

---

*(R,R,R)-syn*

|    |   |   |           |           |           |
|----|---|---|-----------|-----------|-----------|
| 1  | 7 | 0 | 0.281452  | 0.972226  | 0.572877  |
| 2  | 6 | 0 | -0.946517 | 1.441552  | -0.098843 |
| 3  | 6 | 0 | -1.437094 | 2.715998  | 0.610125  |
| 4  | 6 | 0 | 1.277481  | 0.329507  | -0.296619 |
| 5  | 6 | 0 | 2.552418  | 0.116369  | 0.572730  |
| 6  | 7 | 0 | 3.690465  | -0.238121 | -0.372720 |
| 7  | 8 | 0 | 4.070971  | -1.404698 | -0.433924 |
| 8  | 8 | 0 | 4.147679  | 0.678976  | -1.053518 |
| 9  | 6 | 0 | -2.055237 | 0.392420  | -0.101373 |
| 10 | 6 | 0 | -2.280495 | -0.427822 | 1.011335  |

|    |   |   |           |           |           |
|----|---|---|-----------|-----------|-----------|
| 11 | 6 | 0 | -3.341854 | -1.333773 | 1.024145  |
| 12 | 6 | 0 | -4.196587 | -1.433225 | -0.076657 |
| 13 | 6 | 0 | -3.980328 | -0.620274 | -1.190717 |
| 14 | 6 | 0 | -2.916994 | 0.285049  | -1.199824 |
| 15 | 1 | 0 | 1.579996  | 1.001364  | -1.118683 |
| 16 | 6 | 0 | 2.427437  | -0.901722 | 1.692823  |
| 17 | 1 | 0 | 2.859535  | 1.091059  | 0.961958  |
| 18 | 1 | 0 | 0.723053  | 1.783687  | 0.999345  |
| 19 | 1 | 0 | -1.606079 | -0.358005 | 1.858637  |
| 20 | 1 | 0 | -3.500861 | -1.965408 | 1.893854  |
| 21 | 1 | 0 | -5.020331 | -2.141058 | -0.067544 |
| 22 | 1 | 0 | -4.634944 | -0.693196 | -2.054614 |
| 23 | 1 | 0 | -2.752292 | 0.913729  | -2.072234 |
| 24 | 1 | 0 | -0.734258 | 1.708002  | -1.148772 |
| 25 | 1 | 0 | -1.624455 | 2.513121  | 1.669656  |
| 26 | 1 | 0 | -2.368456 | 3.071151  | 0.162302  |
| 27 | 1 | 0 | -0.693002 | 3.517019  | 0.533262  |
| 28 | 6 | 0 | 0.760012  | -0.971377 | -0.916098 |
| 29 | 1 | 0 | 0.373588  | -1.650161 | -0.152451 |
| 30 | 1 | 0 | 1.557076  | -1.478084 | -1.467671 |
| 31 | 1 | 0 | -0.050485 | -0.765684 | -1.618182 |
| 32 | 1 | 0 | 3.337439  | -0.930101 | 2.296879  |
| 33 | 1 | 0 | 2.237306  | -1.904227 | 1.308886  |
| 34 | 1 | 0 | 1.591082  | -0.602386 | 2.327649  |

---

*(R,S,R)-anti*

---

|    |   |   |           |           |           |
|----|---|---|-----------|-----------|-----------|
| 1  | 7 | 0 | 0.251217  | 1.350612  | 0.557980  |
| 2  | 6 | 0 | -1.068681 | 1.635627  | -0.032832 |
| 3  | 6 | 0 | -1.751441 | 2.725672  | 0.807369  |
| 4  | 6 | 0 | 1.169204  | 0.573896  | -0.283485 |
| 5  | 6 | 0 | 2.246927  | -0.034733 | 0.651616  |
| 6  | 7 | 0 | 3.240509  | -0.803752 | -0.199241 |
| 7  | 8 | 0 | 2.825184  | -1.792116 | -0.802876 |
| 8  | 8 | 0 | 4.398837  | -0.394503 | -0.246876 |
| 9  | 6 | 0 | -1.926624 | 0.377514  | -0.101816 |
| 10 | 6 | 0 | -2.084634 | -0.452016 | 1.017729  |
| 11 | 6 | 0 | -2.909750 | -1.574910 | 0.961466  |
| 12 | 6 | 0 | -3.592256 | -1.888246 | -0.217553 |
| 13 | 6 | 0 | -3.440619 | -1.071385 | -1.338268 |
| 14 | 6 | 0 | -2.611240 | 0.051505  | -1.278240 |
| 15 | 6 | 0 | 1.794246  | 1.383227  | -1.432259 |
| 16 | 6 | 0 | 1.695746  | -0.972772 | 1.720004  |
| 17 | 1 | 0 | 2.848603  | 0.761205  | 1.095973  |
| 18 | 1 | 0 | 0.694270  | 2.234534  | 0.802793  |
| 19 | 1 | 0 | -1.549517 | -0.213968 | 1.931495  |
| 20 | 1 | 0 | -3.020523 | -2.207675 | 1.837656  |
| 21 | 1 | 0 | -4.232970 | -2.764122 | -0.261817 |
| 22 | 1 | 0 | -3.961373 | -1.309147 | -2.261455 |
| 23 | 1 | 0 | -2.493641 | 0.681727  | -2.156669 |
| 24 | 1 | 0 | -0.979470 | 2.023561  | -1.062049 |
| 25 | 1 | 0 | -1.865953 | 2.397427  | 1.844820  |
| 26 | 1 | 0 | -2.741943 | 2.953478  | 0.405207  |
| 27 | 1 | 0 | -1.161576 | 3.649561  | 0.800230  |
| 28 | 1 | 0 | 0.598078  | -0.262185 | -0.700488 |
| 29 | 1 | 0 | 2.435464  | 2.183053  | -1.044064 |
| 30 | 1 | 0 | 1.012000  | 1.842105  | -2.042712 |
| 31 | 1 | 0 | 2.396522  | 0.756788  | -2.096768 |
| 32 | 1 | 0 | 2.502297  | -1.380427 | 2.335635  |
| 33 | 1 | 0 | 1.144399  | -1.796948 | 1.262040  |
| 34 | 1 | 0 | 1.015822  | -0.404292 | 2.354639  |

---

## References

1. Becke, A.D. A new mixing of Hartree-Fock and local density-functional theories. *J. Chem. Phys.* **1993**, *98*, 1372–1377.
2. Ditchfield, R.; Hehre, W.J.; Pople, J.A. Self-Consistent Molecular-Orbital Methods. IX. An Extended Gaussian-Type Basis for Molecular-Orbital Studies of Organic Molecules. *J. Chem. Phys.* **1971**, *54*, 724–728.
3. Hehre, W. J.; Ditchfield, R.; Pople, J.A. Self-Consistent Molecular Orbital Methods. XII. Further Extensions of Gaussian-Type Basis Sets for Use in Molecular Orbital Studies of Organic Molecules. *J. Chem. Phys.* **1972**, *56*, 2257–2261.
4. Hariharan, P.C.; Pople, J.A. Influence of polarization functions on MO hydrogenation energies. *Theor. Chim. Acta* **1973**, *28*, 213–223.
5. Barone, V.; Cossi, M.; Tomasi, J. Geometry optimization of molecular structures in solution by the polarizable continuum model. *J. Comput. Chem.* **1998**, *19*, 404–417.
6. Frisch, M. J.; Trucks, G. W.; Schlegel, H. B.; Scuseria, G. E.; Robb, M. A.; Cheeseman, J. R.; Scalmani, G.; Barone, V.; Mennucci, B.; Petersson, G. A.; *et al.* *Gaussian 09, Revision D.01*; Gaussian, Inc.: Wallingford, CT, USA, 2013.
